# Supplementary material for: PCPPI: a comprehensive database for the prediction of Penicillium–crop protein–protein interactions
Source: Database (Oxford). 2017 Feb 26;2017:baw170. doi: 10.1093/database/baw170 (PMC5467543; doi:10.1093/database/baw170)
Supplement: Supplementary Data [file baw170_Supp.xlsx]

## Sheet: Table S1
Supplementary Table 1. The 106 domains interacting with the LysM domain.
Pfam ID	Description
PF00035	Double-stranded RNA binding motif
PF00109	Beta-ketoacyl synthase, N-terminal domain
PF00140	Sigma-70 factor, region 1.2
PF00154	recA bacterial DNA recombination protein
PF00163	Ribosomal protein S4/S9 N-terminal domain
PF00166	Chaperonin 10 Kd subunit
PF00216	Bacterial DNA-binding protein
PF00246	Zinc carboxypeptidase
PF00252	Ribosomal protein L16p/L10e
PF00308	Bacterial dnaA protein
PF00417	Ribosomal protein S3, N-terminal domain
PF00436	Single-strand binding protein family
PF00453	Ribosomal protein L20
PF00471	Ribosomal protein L33
PF00472	RF-1 domain
PF00476	DNA polymerase family A
PF00488	MutS domain V
PF00533	BRCA1 C Terminus (BRCT) domain
PF00542	Ribosomal protein L7/L12 C-terminal domain
PF00550	Phosphopantetheine attachment site
PF00574	Clp protease
PF00672	HAMP domain
PF00704	Glycosyl hydrolases family 18
PF00707	Translation initiation factor IF-3, C-terminal domain
PF00712	DNA polymerase III beta subunit, N-terminal domain
PF00746	Gram positive anchor
PF00756	Putative esterase
PF00772	DnaB-like helicase N terminal domain
PF00829	Ribosomal prokaryotic L21 protein
PF00849	RNA pseudouridylate synthase
PF00877	NlpC/P60 family
PF00889	Elongation factor TS
PF00905	Penicillin binding protein transpeptidase domain
PF00912	Transglycosylase
PF00959	Phage lysozyme
PF01000	RNA polymerase Rpb3/RpoA insert domain
PF01016	Ribosomal L27 protein
PF01029	NusB family
PF01043	SecA preprotein cross-linking domain
PF01098	Cell cycle protein
PF01121	Dephospho-CoA kinase
PF01132	Elongation factor P (EF-P) OB domain
PF01195	Peptidyl-tRNA hydrolase
PF01207	Dihydrouridine synthase (Dus)
PF01225	Mur ligase family, catalytic domain
PF01245	Ribosomal protein L19
PF01250	Ribosomal protein S6
PF01252	Signal peptidase (SPase) II
PF01281	Ribosomal protein L9, N-terminal domain
PF01305	Ribosomal protein L15 amino terminal region
PF01327	Polypeptide deformylase
PF01367	5'-3' exonuclease, C-terminal SAM fold
PF01377
PF01464	Transglycosylase SLT domain
PF01471	Putative peptidoglycan binding domain
PF01510	N-acetylmuramoyl-L-alanine amidase
PF01520	N-acetylmuramoyl-L-alanine amidase
PF01551	Peptidase family M23
PF01632	Ribosomal protein L35
PF01649	Ribosomal protein S20
PF01653	NAD-dependent DNA ligase adenylation domain
PF01668	SmpB protein
PF01715	IPP transferase
PF01743	Poly A polymerase head domain
PF01746	tRNA (Guanine-1)-methyltransferase
PF01765	Ribosome recycling factor
PF01782	RimM N-terminal domain
PF01790	Prolipoprotein diacylglyceryl transferase
PF01795	MraW methylase family
PF01807	CHC2 zinc finger
PF01820	D-ala D-ala ligase N-terminus
PF01832	Mannosyl-glycoprotein endo-beta-N-acetylglucosaminidase
PF02033	Ribosome-binding factor A
PF02096	60Kd inner membrane protein
PF02130	Uncharacterized protein family UPF0054
PF02357	Transcription termination factor nusG
PF02367	Uncharacterised P-loop hydrolase UPF0079
PF02368	Bacterial Ig-like domain (group 2)
PF02369	Bacterial Ig-like domain (group 1)
PF02410	Domain of unknown function DUF143
PF02473
PF02547	Queuosine biosynthesis protein
PF02575	Uncharacterised BCR, YbaB family COG0718
PF02576	Uncharacterised BCR, YhbC family COG0779
PF02739	5'-3' exonuclease, N-terminal resolvase-like domain
PF02767	DNA polymerase III beta subunit, central domain
PF02768	DNA polymerase III beta subunit, C-terminal domain
PF02801	Beta-ketoacyl synthase, C-terminal domain
PF02873	UDP-N-acetylenolpyruvoylglucosamine reductase, C-terminal domain
PF02911	Formyl transferase, C-terminal domain
PF02912	Aminoacyl tRNA synthetase class II, N-terminal domain
PF03033	Glycosyltransferase family 28 N-terminal domain
PF03118	Bacterial RNA polymerase, alpha chain C terminal domain
PF03120	NAD-dependent DNA ligase OB-fold domain
PF03147	Ferredoxin-fold anticodon binding domain
PF03461	TRCF domain
PF03462	PCRF domain
PF03471	Transporter associated domain
PF03602	Conserved hypothetical protein 95
PF03652	Uncharacterised protein family (UPF0081)
PF03717	Penicillin-binding Protein dimerisation domain
PF03734	Ykud domain
PF03772	Competence protein
PF03796	DnaB-like helicase C terminal domain
PF03840	Preprotein translocase SecG subunit
PF04972	Putative phospholipid-binding domain

## Sheet: Table S2
Supplementary Table 2. 35 proteins that contain the LysM domain.
Protein ID	Protein Name	Pfam 1	Pfam 2	Pfam 3	Pfam 4
MDP0000124606	MDP0000124606	PF01476	PF07714
MDP0000137744	MDP0000137744	PF01476	PF00069
MDP0000169047	MDP0000169047	PF01476	PF00069
MDP0000182108	MDP0000182108	PF01476	PF00069
MDP0000183195	MDP0000183195	PF01476	PF00069
MDP0000193777	MDP0000193777	PF01476	PF07714
MDP0000294294	MDP0000294294	PF01476	PF00069
MDP0000306111	MDP0000306111	PF00928	PF01476	PF00069	PF01217
MDP0000320123	MDP0000320123	PF00834	PF01476	PF00069
MDP0000426154	MDP0000426154	PF01476	PF00069
MDP0000656197	MDP0000656197	PF01476	PF00069
MDP0000681106	MDP0000681106	PF01476	PF00069
Ach00g025351.1	LysM domain receptor-like kinase 4	PF01476	PF00069
Ach00g254361.2	Receptor protein kinase, putative	PF01476	PF00069
Ach00g260131.2	Protein LYK5	PF01476	PF00069
Ach07g074271.2	LysM domain receptor-like kinase 3 (Precursor)	PF01476	PF00069
Ach11g050751.1	Kinase family protein / peptidoglycan-binding LysM domain-containing protein	PF01476	PF07714
Ach16g216391.2	Kinase family protein / peptidoglycan-binding LysM domain-containing protein	PF01476	PF07714
Ach18g473551.2	Receptor protein kinase, putative	PF01476	PF00069
Ach26g280831.2	Hypothetical protein	PF01476	PF00069
GRMZM2G022645	GRMZM2G022645_P01	PF01476	PF00069
GRMZM2G310840	GRMZM2G310840_P01	PF01476	PF00069
GRMZM2G583971	GRMZM2G583971_P01	PF01476	PF00069
PCP000222	PCP000222	PF01476	PF07714	PF00069
PCP000376	PCP000376	PF00928	PF01476	PF00069	PF01217
PCP002145	PCP002145	PF01476	PF07714
PCP003981	PCP003981	PF01476	PF07714
PCP015994	PCP015994	PF01476	PF00069
PCP038026.1		PF01476	PF00069
FANhyb_rscf00000845.1.g00002.1	FANhyb_rscf00000845.1.g00002.1	PF01476	PF00069
FANhyb_rscf00001256.1.g00001.1	FANhyb_rscf00001256.1.g00001.1	PF01476	PF00069
FANhyb_rscf00004771.1.g00001.1	FANhyb_rscf00004771.1.g00001.1	PF01476	PF00069
Solyc02g089900.1.1	Receptor-like kinase	PF01476	PF00069	PF02480
Solyc07g049180.2.1	Receptor-like protein kinase At5g59670	PF01476	PF07714
Solyc09g083210.2.1	Receptor-like protein kinase	PF01476	PF00069

## Sheet: Table S3
Supplementary Table 3. 1,869 PPIs that contain proteins with the LysM domain.
PCPPI AC	Protein ID in Penicillium expansum	Protein ID in crops
PCMD002503	KGO35970	MDP0000124606
PCMD002504	KGO36255	MDP0000124606
PCMD002505	KGO36262	MDP0000124606
PCMD002506	KGO36498	MDP0000124606
PCMD002507	KGO37071	MDP0000124606
PCMD002508	KGO37385	MDP0000124606
PCMD002509	KGO37457	MDP0000124606
PCMD002510	KGO37680	MDP0000124606
PCMD002511	KGO38190	MDP0000124606
PCMD002512	KGO38289	MDP0000124606
PCMD002513	KGO40389	MDP0000124606
PCMD002514	KGO40714	MDP0000124606
PCMD002515	KGO40841	MDP0000124606
PCMD002516	KGO43463	MDP0000124606
PCMD002517	KGO43741	MDP0000124606
PCMD002518	KGO44751	MDP0000124606
PCMD002519	KGO44775	MDP0000124606
PCMD002520	KGO46335	MDP0000124606
PCMD002521	KGO47104	MDP0000124606
PCMD002522	KGO47126	MDP0000124606
PCMD002523	KGO47303	MDP0000124606
PCMD002524	KGO47494	MDP0000124606
PCMD002525	KGO48908	MDP0000124606
PCMD002526	KGO49326	MDP0000124606
PCMD002527	KGO50010	MDP0000124606
PCMD002528	KGO50035	MDP0000124606
PCMD002529	KGO50759	MDP0000124606
PCMD002530	KGO50798	MDP0000124606
PCMD002531	KGO50864	MDP0000124606
PCMD002532	KGO50877	MDP0000124606
PCMD002533	KGO51569	MDP0000124606
PCMD002534	KGO51863	MDP0000124606
PCMD002535	KGO53623	MDP0000124606
PCMD002536	KGO54407	MDP0000124606
PCMD002537	KGO54421	MDP0000124606
PCMD002538	KGO54663	MDP0000124606
PCMD002539	KGO55310	MDP0000124606
PCMD002540	KGO55473	MDP0000124606
PCMD002541	KGO55917	MDP0000124606
PCMD002542	KGO56042	MDP0000124606
PCMD002543	KGO56098	MDP0000124606
PCMD002544	KGO58681	MDP0000124606
PCMD002545	KGO58706	MDP0000124606
PCMD002546	KGO59080	MDP0000124606
PCMD002547	KGO59247	MDP0000124606
PCMD002548	KGO60685	MDP0000124606
PCMD002549	KGO60876	MDP0000124606
PCMD002550	KGO61285	MDP0000124606
PCMD002551	KGO61597	MDP0000124606
PCMD002552	KGO61600	MDP0000124606
PCMD002553	KGO61611	MDP0000124606
PCMD002554	KGO61626	MDP0000124606
PCMD002555	KGO63446	MDP0000124606
PCMD002556	KGO63699	MDP0000124606
PCMD002557	KGO63759	MDP0000124606
PCMD002558	KGO63779	MDP0000124606
PCMD002559	KGO64520	MDP0000124606
PCMD002560	KGO64814	MDP0000124606
PCMD002561	KGO66139	MDP0000124606
PCMD002562	KGO66802	MDP0000124606
PCMD002563	KGO67082	MDP0000124606
PCMD002564	KGO67174	MDP0000124606
PCMD002565	KGO69130	MDP0000124606
PCMD002566	KGO70026	MDP0000124606
PCMD002567	KGO70105	MDP0000124606
PCMD002568	KGO70634	MDP0000124606
PCMD002569	KGO71047	MDP0000124606
PCMD002570	KGO71061	MDP0000124606
PCMD002571	KGO71369	MDP0000124606
PCMD002572	KGO71409	MDP0000124606
PCMD002573	KGO71849	MDP0000124606
PCMD002574	KGO72825	MDP0000124606
PCMD002575	KGO73019	MDP0000124606
PCMD002576	KGO73457	MDP0000124606
PCMD002577	KGO73511	MDP0000124606
PCMD002578	KGO73617	MDP0000124606
PCMD006143	KGO35970	MDP0000137744
PCMD006144	KGO36255	MDP0000137744
PCMD006145	KGO36262	MDP0000137744
PCMD006146	KGO36498	MDP0000137744
PCMD006147	KGO37071	MDP0000137744
PCMD006148	KGO37385	MDP0000137744
PCMD006149	KGO37457	MDP0000137744
PCMD006150	KGO37680	MDP0000137744
PCMD006151	KGO38190	MDP0000137744
PCMD006152	KGO38289	MDP0000137744
PCMD006153	KGO40389	MDP0000137744
PCMD006154	KGO40714	MDP0000137744
PCMD006155	KGO40841	MDP0000137744
PCMD006156	KGO43463	MDP0000137744
PCMD006157	KGO43741	MDP0000137744
PCMD006158	KGO44751	MDP0000137744
PCMD006159	KGO44775	MDP0000137744
PCMD006160	KGO46335	MDP0000137744
PCMD006161	KGO47104	MDP0000137744
PCMD006162	KGO47126	MDP0000137744
PCMD006163	KGO47303	MDP0000137744
PCMD006164	KGO47494	MDP0000137744
PCMD006165	KGO48908	MDP0000137744
PCMD006166	KGO49326	MDP0000137744
PCMD006167	KGO50010	MDP0000137744
PCMD006168	KGO50035	MDP0000137744
PCMD006169	KGO50759	MDP0000137744
PCMD006170	KGO50798	MDP0000137744
PCMD006171	KGO50864	MDP0000137744
PCMD006172	KGO50877	MDP0000137744
PCMD006173	KGO51569	MDP0000137744
PCMD006174	KGO51863	MDP0000137744
PCMD006175	KGO53623	MDP0000137744
PCMD006176	KGO54407	MDP0000137744
PCMD006177	KGO54421	MDP0000137744
PCMD006178	KGO54663	MDP0000137744
PCMD006179	KGO55310	MDP0000137744
PCMD006180	KGO55473	MDP0000137744
PCMD006181	KGO55917	MDP0000137744
PCMD006182	KGO56042	MDP0000137744
PCMD006183	KGO56098	MDP0000137744
PCMD006184	KGO58681	MDP0000137744
PCMD006185	KGO58706	MDP0000137744
PCMD006186	KGO59080	MDP0000137744
PCMD006187	KGO59247	MDP0000137744
PCMD006188	KGO60685	MDP0000137744
PCMD006189	KGO60876	MDP0000137744
PCMD006190	KGO61285	MDP0000137744
PCMD006191	KGO61597	MDP0000137744
PCMD006192	KGO61600	MDP0000137744
PCMD006193	KGO61611	MDP0000137744
PCMD006194	KGO61626	MDP0000137744
PCMD006195	KGO63446	MDP0000137744
PCMD006196	KGO63699	MDP0000137744
PCMD006197	KGO63759	MDP0000137744
PCMD006198	KGO63779	MDP0000137744
PCMD006199	KGO64520	MDP0000137744
PCMD006200	KGO64814	MDP0000137744
PCMD006201	KGO66139	MDP0000137744
PCMD006202	KGO66802	MDP0000137744
PCMD006203	KGO67082	MDP0000137744
PCMD006204	KGO67174	MDP0000137744
PCMD006205	KGO69130	MDP0000137744
PCMD006206	KGO70026	MDP0000137744
PCMD006207	KGO70105	MDP0000137744
PCMD006208	KGO70634	MDP0000137744
PCMD006209	KGO70733	MDP0000137744
PCMD006210	KGO71047	MDP0000137744
PCMD006211	KGO71061	MDP0000137744
PCMD006212	KGO71369	MDP0000137744
PCMD006213	KGO71409	MDP0000137744
PCMD006214	KGO71849	MDP0000137744
PCMD006215	KGO72825	MDP0000137744
PCMD006216	KGO73019	MDP0000137744
PCMD006217	KGO73457	MDP0000137744
PCMD006218	KGO73511	MDP0000137744
PCMD006219	KGO73617	MDP0000137744
PCMD017684	KGO35970	MDP0000169047
PCMD017685	KGO36255	MDP0000169047
PCMD017686	KGO36262	MDP0000169047
PCMD017687	KGO36498	MDP0000169047
PCMD017688	KGO37071	MDP0000169047
PCMD017689	KGO37385	MDP0000169047
PCMD017690	KGO37457	MDP0000169047
PCMD017691	KGO37680	MDP0000169047
PCMD017692	KGO38190	MDP0000169047
PCMD017693	KGO38289	MDP0000169047
PCMD017694	KGO40389	MDP0000169047
PCMD017695	KGO40714	MDP0000169047
PCMD017696	KGO40841	MDP0000169047
PCMD017697	KGO43463	MDP0000169047
PCMD017698	KGO43741	MDP0000169047
PCMD017699	KGO44751	MDP0000169047
PCMD017700	KGO44775	MDP0000169047
PCMD017701	KGO46335	MDP0000169047
PCMD017702	KGO47104	MDP0000169047
PCMD017703	KGO47126	MDP0000169047
PCMD017704	KGO47303	MDP0000169047
PCMD017705	KGO47494	MDP0000169047
PCMD017706	KGO48908	MDP0000169047
PCMD017707	KGO49326	MDP0000169047
PCMD017708	KGO50010	MDP0000169047
PCMD017709	KGO50035	MDP0000169047
PCMD017710	KGO50759	MDP0000169047
PCMD017711	KGO50798	MDP0000169047
PCMD017712	KGO50864	MDP0000169047
PCMD017713	KGO50877	MDP0000169047
PCMD017714	KGO51569	MDP0000169047
PCMD017715	KGO51863	MDP0000169047
PCMD017716	KGO53623	MDP0000169047
PCMD017717	KGO54407	MDP0000169047
PCMD017718	KGO54421	MDP0000169047
PCMD017719	KGO54663	MDP0000169047
PCMD017720	KGO55310	MDP0000169047
PCMD017721	KGO55473	MDP0000169047
PCMD017722	KGO55917	MDP0000169047
PCMD017723	KGO56042	MDP0000169047
PCMD017724	KGO56098	MDP0000169047
PCMD017725	KGO58681	MDP0000169047
PCMD017726	KGO58706	MDP0000169047
PCMD017727	KGO59080	MDP0000169047
PCMD017728	KGO59247	MDP0000169047
PCMD017729	KGO60685	MDP0000169047
PCMD017730	KGO60876	MDP0000169047
PCMD017731	KGO61285	MDP0000169047
PCMD017732	KGO61597	MDP0000169047
PCMD017733	KGO61600	MDP0000169047
PCMD017734	KGO61611	MDP0000169047
PCMD017735	KGO61626	MDP0000169047
PCMD017736	KGO63446	MDP0000169047
PCMD017737	KGO63699	MDP0000169047
PCMD017738	KGO63759	MDP0000169047
PCMD017739	KGO63779	MDP0000169047
PCMD017740	KGO64520	MDP0000169047
PCMD017741	KGO64814	MDP0000169047
PCMD017742	KGO66139	MDP0000169047
PCMD017743	KGO66802	MDP0000169047
PCMD017744	KGO67082	MDP0000169047
PCMD017745	KGO67174	MDP0000169047
PCMD017746	KGO68698	MDP0000169047
PCMD017747	KGO69130	MDP0000169047
PCMD017748	KGO70026	MDP0000169047
PCMD017749	KGO70105	MDP0000169047
PCMD017750	KGO70634	MDP0000169047
PCMD017751	KGO70733	MDP0000169047
PCMD017752	KGO71047	MDP0000169047
PCMD017753	KGO71061	MDP0000169047
PCMD017754	KGO71369	MDP0000169047
PCMD017755	KGO71409	MDP0000169047
PCMD017756	KGO71849	MDP0000169047
PCMD017757	KGO72825	MDP0000169047
PCMD017758	KGO73019	MDP0000169047
PCMD017759	KGO73457	MDP0000169047
PCMD017760	KGO73511	MDP0000169047
PCMD017761	KGO73617	MDP0000169047
PCMD022170	KGO35970	MDP0000182108
PCMD022171	KGO36255	MDP0000182108
PCMD022172	KGO36262	MDP0000182108
PCMD022173	KGO36498	MDP0000182108
PCMD022174	KGO37071	MDP0000182108
PCMD022175	KGO37385	MDP0000182108
PCMD022176	KGO37457	MDP0000182108
PCMD022177	KGO37680	MDP0000182108
PCMD022178	KGO38190	MDP0000182108
PCMD022179	KGO38289	MDP0000182108
PCMD022180	KGO40389	MDP0000182108
PCMD022181	KGO40714	MDP0000182108
PCMD022182	KGO40841	MDP0000182108
PCMD022183	KGO43463	MDP0000182108
PCMD022184	KGO43741	MDP0000182108
PCMD022185	KGO44751	MDP0000182108
PCMD022186	KGO44775	MDP0000182108
PCMD022187	KGO46335	MDP0000182108
PCMD022188	KGO47104	MDP0000182108
PCMD022189	KGO47126	MDP0000182108
PCMD022190	KGO47303	MDP0000182108
PCMD022191	KGO47494	MDP0000182108
PCMD022192	KGO48908	MDP0000182108
PCMD022193	KGO49326	MDP0000182108
PCMD022194	KGO50010	MDP0000182108
PCMD022195	KGO50035	MDP0000182108
PCMD022196	KGO50759	MDP0000182108
PCMD022197	KGO50798	MDP0000182108
PCMD022198	KGO50864	MDP0000182108
PCMD022199	KGO50877	MDP0000182108
PCMD022200	KGO51569	MDP0000182108
PCMD022201	KGO51863	MDP0000182108
PCMD022202	KGO53623	MDP0000182108
PCMD022203	KGO54407	MDP0000182108
PCMD022204	KGO54421	MDP0000182108
PCMD022205	KGO54663	MDP0000182108
PCMD022206	KGO55310	MDP0000182108
PCMD022207	KGO55473	MDP0000182108
PCMD022208	KGO55917	MDP0000182108
PCMD022209	KGO56042	MDP0000182108
PCMD022210	KGO56098	MDP0000182108
PCMD022211	KGO58681	MDP0000182108
PCMD022212	KGO58706	MDP0000182108
PCMD022213	KGO59080	MDP0000182108
PCMD022214	KGO59247	MDP0000182108
PCMD022215	KGO60685	MDP0000182108
PCMD022216	KGO60876	MDP0000182108
PCMD022217	KGO61285	MDP0000182108
PCMD022218	KGO61597	MDP0000182108
PCMD022219	KGO61600	MDP0000182108
PCMD022220	KGO61611	MDP0000182108
PCMD022221	KGO61626	MDP0000182108
PCMD022222	KGO63446	MDP0000182108
PCMD022223	KGO63699	MDP0000182108
PCMD022224	KGO63759	MDP0000182108
PCMD022225	KGO63779	MDP0000182108
PCMD022226	KGO64520	MDP0000182108
PCMD022227	KGO64814	MDP0000182108
PCMD022228	KGO66139	MDP0000182108
PCMD022229	KGO66802	MDP0000182108
PCMD022230	KGO67082	MDP0000182108
PCMD022231	KGO67174	MDP0000182108
PCMD022232	KGO69130	MDP0000182108
PCMD022233	KGO70026	MDP0000182108
PCMD022234	KGO70105	MDP0000182108
PCMD022235	KGO70634	MDP0000182108
PCMD022236	KGO70733	MDP0000182108
PCMD022237	KGO71047	MDP0000182108
PCMD022238	KGO71061	MDP0000182108
PCMD022239	KGO71369	MDP0000182108
PCMD022240	KGO71409	MDP0000182108
PCMD022241	KGO71849	MDP0000182108
PCMD022242	KGO72825	MDP0000182108
PCMD022243	KGO73019	MDP0000182108
PCMD022244	KGO73457	MDP0000182108
PCMD022245	KGO73511	MDP0000182108
PCMD022246	KGO73617	MDP0000182108
PCMD022563	KGO35970	MDP0000183195
PCMD022564	KGO36255	MDP0000183195
PCMD022565	KGO36262	MDP0000183195
PCMD022566	KGO36498	MDP0000183195
PCMD022567	KGO37071	MDP0000183195
PCMD022568	KGO37385	MDP0000183195
PCMD022569	KGO37457	MDP0000183195
PCMD022570	KGO37680	MDP0000183195
PCMD022571	KGO38190	MDP0000183195
PCMD022572	KGO38289	MDP0000183195
PCMD022573	KGO40389	MDP0000183195
PCMD022574	KGO40714	MDP0000183195
PCMD022575	KGO40841	MDP0000183195
PCMD022576	KGO43463	MDP0000183195
PCMD022577	KGO43741	MDP0000183195
PCMD022578	KGO44751	MDP0000183195
PCMD022579	KGO44775	MDP0000183195
PCMD022580	KGO46335	MDP0000183195
PCMD022581	KGO47104	MDP0000183195
PCMD022582	KGO47126	MDP0000183195
PCMD022583	KGO47303	MDP0000183195
PCMD022584	KGO47494	MDP0000183195
PCMD022585	KGO48908	MDP0000183195
PCMD022586	KGO49326	MDP0000183195
PCMD022587	KGO50010	MDP0000183195
PCMD022588	KGO50035	MDP0000183195
PCMD022589	KGO50759	MDP0000183195
PCMD022590	KGO50798	MDP0000183195
PCMD022591	KGO50864	MDP0000183195
PCMD022592	KGO50877	MDP0000183195
PCMD022593	KGO51569	MDP0000183195
PCMD022594	KGO51863	MDP0000183195
PCMD022595	KGO53623	MDP0000183195
PCMD022596	KGO54407	MDP0000183195
PCMD022597	KGO54421	MDP0000183195
PCMD022598	KGO54663	MDP0000183195
PCMD022599	KGO55310	MDP0000183195
PCMD022600	KGO55473	MDP0000183195
PCMD022601	KGO55917	MDP0000183195
PCMD022602	KGO56042	MDP0000183195
PCMD022603	KGO56098	MDP0000183195
PCMD022604	KGO58681	MDP0000183195
PCMD022605	KGO58706	MDP0000183195
PCMD022606	KGO59080	MDP0000183195
PCMD022607	KGO59247	MDP0000183195
PCMD022608	KGO60685	MDP0000183195
PCMD022609	KGO60876	MDP0000183195
PCMD022610	KGO61285	MDP0000183195
PCMD022611	KGO61597	MDP0000183195
PCMD022612	KGO61600	MDP0000183195
PCMD022613	KGO61611	MDP0000183195
PCMD022614	KGO61626	MDP0000183195
PCMD022615	KGO63446	MDP0000183195
PCMD022616	KGO63699	MDP0000183195
PCMD022617	KGO63759	MDP0000183195
PCMD022618	KGO63779	MDP0000183195
PCMD022619	KGO64520	MDP0000183195
PCMD022620	KGO64814	MDP0000183195
PCMD022621	KGO66139	MDP0000183195
PCMD022622	KGO66802	MDP0000183195
PCMD022623	KGO67082	MDP0000183195
PCMD022624	KGO67174	MDP0000183195
PCMD022625	KGO68698	MDP0000183195
PCMD022626	KGO69130	MDP0000183195
PCMD022627	KGO70026	MDP0000183195
PCMD022628	KGO70105	MDP0000183195
PCMD022629	KGO70634	MDP0000183195
PCMD022630	KGO70733	MDP0000183195
PCMD022631	KGO71047	MDP0000183195
PCMD022632	KGO71061	MDP0000183195
PCMD022633	KGO71369	MDP0000183195
PCMD022634	KGO71409	MDP0000183195
PCMD022635	KGO71849	MDP0000183195
PCMD022636	KGO72825	MDP0000183195
PCMD022637	KGO73019	MDP0000183195
PCMD022638	KGO73457	MDP0000183195
PCMD022639	KGO73511	MDP0000183195
PCMD022640	KGO73617	MDP0000183195
PCMD026655	KGO35970	MDP0000193777
PCMD026656	KGO36255	MDP0000193777
PCMD026657	KGO36262	MDP0000193777
PCMD026658	KGO36498	MDP0000193777
PCMD026659	KGO37071	MDP0000193777
PCMD026660	KGO37385	MDP0000193777
PCMD026661	KGO37457	MDP0000193777
PCMD026662	KGO37680	MDP0000193777
PCMD026663	KGO38190	MDP0000193777
PCMD026664	KGO38289	MDP0000193777
PCMD026665	KGO40389	MDP0000193777
PCMD026666	KGO40714	MDP0000193777
PCMD026667	KGO40841	MDP0000193777
PCMD026668	KGO43463	MDP0000193777
PCMD026669	KGO43741	MDP0000193777
PCMD026670	KGO44751	MDP0000193777
PCMD026671	KGO44775	MDP0000193777
PCMD026672	KGO46335	MDP0000193777
PCMD026673	KGO47104	MDP0000193777
PCMD026674	KGO47126	MDP0000193777
PCMD026675	KGO47303	MDP0000193777
PCMD026676	KGO47494	MDP0000193777
PCMD026677	KGO48908	MDP0000193777
PCMD026678	KGO49326	MDP0000193777
PCMD026679	KGO50010	MDP0000193777
PCMD026680	KGO50035	MDP0000193777
PCMD026681	KGO50759	MDP0000193777
PCMD026682	KGO50798	MDP0000193777
PCMD026683	KGO50864	MDP0000193777
PCMD026684	KGO50877	MDP0000193777
PCMD026685	KGO51569	MDP0000193777
PCMD026686	KGO51863	MDP0000193777
PCMD026687	KGO53623	MDP0000193777
PCMD026688	KGO54407	MDP0000193777
PCMD026689	KGO54421	MDP0000193777
PCMD026690	KGO54663	MDP0000193777
PCMD026691	KGO55310	MDP0000193777
PCMD026692	KGO55473	MDP0000193777
PCMD026693	KGO55917	MDP0000193777
PCMD026694	KGO56042	MDP0000193777
PCMD026695	KGO56098	MDP0000193777
PCMD026696	KGO58681	MDP0000193777
PCMD026697	KGO58706	MDP0000193777
PCMD026698	KGO59080	MDP0000193777
PCMD026699	KGO59247	MDP0000193777
PCMD026700	KGO60685	MDP0000193777
PCMD026701	KGO60876	MDP0000193777
PCMD026702	KGO61285	MDP0000193777
PCMD026703	KGO61597	MDP0000193777
PCMD026704	KGO61600	MDP0000193777
PCMD026705	KGO61611	MDP0000193777
PCMD026706	KGO61626	MDP0000193777
PCMD026707	KGO63446	MDP0000193777
PCMD026708	KGO63699	MDP0000193777
PCMD026709	KGO63759	MDP0000193777
PCMD026710	KGO63779	MDP0000193777
PCMD026711	KGO64520	MDP0000193777
PCMD026712	KGO64814	MDP0000193777
PCMD026713	KGO66139	MDP0000193777
PCMD026714	KGO66802	MDP0000193777
PCMD026715	KGO67082	MDP0000193777
PCMD026716	KGO67174	MDP0000193777
PCMD026717	KGO69130	MDP0000193777
PCMD026718	KGO70026	MDP0000193777
PCMD026719	KGO70105	MDP0000193777
PCMD026720	KGO70634	MDP0000193777
PCMD026721	KGO71047	MDP0000193777
PCMD026722	KGO71061	MDP0000193777
PCMD026723	KGO71369	MDP0000193777
PCMD026724	KGO71409	MDP0000193777
PCMD026725	KGO71849	MDP0000193777
PCMD026726	KGO72825	MDP0000193777
PCMD026727	KGO73019	MDP0000193777
PCMD026728	KGO73457	MDP0000193777
PCMD026729	KGO73511	MDP0000193777
PCMD026730	KGO73617	MDP0000193777
PCMD063831	KGO35970	MDP0000294294
PCMD063832	KGO36255	MDP0000294294
PCMD063833	KGO36262	MDP0000294294
PCMD063834	KGO36498	MDP0000294294
PCMD063835	KGO37071	MDP0000294294
PCMD063836	KGO37385	MDP0000294294
PCMD063837	KGO37457	MDP0000294294
PCMD063838	KGO37680	MDP0000294294
PCMD063839	KGO38190	MDP0000294294
PCMD063840	KGO38289	MDP0000294294
PCMD063841	KGO40389	MDP0000294294
PCMD063842	KGO40714	MDP0000294294
PCMD063843	KGO40841	MDP0000294294
PCMD063844	KGO43463	MDP0000294294
PCMD063845	KGO43741	MDP0000294294
PCMD063846	KGO44751	MDP0000294294
PCMD063847	KGO44775	MDP0000294294
PCMD063848	KGO46335	MDP0000294294
PCMD063849	KGO47104	MDP0000294294
PCMD063850	KGO47126	MDP0000294294
PCMD063851	KGO47303	MDP0000294294
PCMD063852	KGO47494	MDP0000294294
PCMD063853	KGO48908	MDP0000294294
PCMD063854	KGO49326	MDP0000294294
PCMD063855	KGO50010	MDP0000294294
PCMD063856	KGO50035	MDP0000294294
PCMD063857	KGO50759	MDP0000294294
PCMD063858	KGO50798	MDP0000294294
PCMD063859	KGO50864	MDP0000294294
PCMD063860	KGO50877	MDP0000294294
PCMD063861	KGO51569	MDP0000294294
PCMD063862	KGO51863	MDP0000294294
PCMD063863	KGO53623	MDP0000294294
PCMD063864	KGO54407	MDP0000294294
PCMD063865	KGO54421	MDP0000294294
PCMD063866	KGO54663	MDP0000294294
PCMD063867	KGO55310	MDP0000294294
PCMD063868	KGO55473	MDP0000294294
PCMD063869	KGO55917	MDP0000294294
PCMD063870	KGO56042	MDP0000294294
PCMD063871	KGO56098	MDP0000294294
PCMD063872	KGO58681	MDP0000294294
PCMD063873	KGO58706	MDP0000294294
PCMD063874	KGO59080	MDP0000294294
PCMD063875	KGO59247	MDP0000294294
PCMD063876	KGO60685	MDP0000294294
PCMD063877	KGO60876	MDP0000294294
PCMD063878	KGO61285	MDP0000294294
PCMD063879	KGO61597	MDP0000294294
PCMD063880	KGO61600	MDP0000294294
PCMD063881	KGO61611	MDP0000294294
PCMD063882	KGO61626	MDP0000294294
PCMD063883	KGO63446	MDP0000294294
PCMD063884	KGO63699	MDP0000294294
PCMD063885	KGO63759	MDP0000294294
PCMD063886	KGO63779	MDP0000294294
PCMD063887	KGO64520	MDP0000294294
PCMD063888	KGO64814	MDP0000294294
PCMD063889	KGO66139	MDP0000294294
PCMD063890	KGO66802	MDP0000294294
PCMD063891	KGO67082	MDP0000294294
PCMD063892	KGO67174	MDP0000294294
PCMD063893	KGO68698	MDP0000294294
PCMD063894	KGO69130	MDP0000294294
PCMD063895	KGO70026	MDP0000294294
PCMD063896	KGO70105	MDP0000294294
PCMD063897	KGO70634	MDP0000294294
PCMD063898	KGO70733	MDP0000294294
PCMD063899	KGO71047	MDP0000294294
PCMD063900	KGO71061	MDP0000294294
PCMD063901	KGO71369	MDP0000294294
PCMD063902	KGO71409	MDP0000294294
PCMD063903	KGO71849	MDP0000294294
PCMD063904	KGO72825	MDP0000294294
PCMD063905	KGO73019	MDP0000294294
PCMD063906	KGO73457	MDP0000294294
PCMD063907	KGO73511	MDP0000294294
PCMD063908	KGO73617	MDP0000294294
PCMD067479	KGO35970	MDP0000306111
PCMD067480	KGO36255	MDP0000306111
PCMD067481	KGO36262	MDP0000306111
PCMD067482	KGO36498	MDP0000306111
PCMD067483	KGO37071	MDP0000306111
PCMD067484	KGO37385	MDP0000306111
PCMD067485	KGO37457	MDP0000306111
PCMD067486	KGO37680	MDP0000306111
PCMD067487	KGO38190	MDP0000306111
PCMD067488	KGO38289	MDP0000306111
PCMD067489	KGO40389	MDP0000306111
PCMD067490	KGO40714	MDP0000306111
PCMD067491	KGO40841	MDP0000306111
PCMD067492	KGO43463	MDP0000306111
PCMD067493	KGO43741	MDP0000306111
PCMD067494	KGO44751	MDP0000306111
PCMD067495	KGO44775	MDP0000306111
PCMD067496	KGO46335	MDP0000306111
PCMD067497	KGO47104	MDP0000306111
PCMD067498	KGO47126	MDP0000306111
PCMD067499	KGO47303	MDP0000306111
PCMD067500	KGO47494	MDP0000306111
PCMD067501	KGO48908	MDP0000306111
PCMD067502	KGO49326	MDP0000306111
PCMD067503	KGO50010	MDP0000306111
PCMD067504	KGO50035	MDP0000306111
PCMD067505	KGO50759	MDP0000306111
PCMD067506	KGO50798	MDP0000306111
PCMD067507	KGO50864	MDP0000306111
PCMD067508	KGO50877	MDP0000306111
PCMD067509	KGO51569	MDP0000306111
PCMD067510	KGO51863	MDP0000306111
PCMD067511	KGO53623	MDP0000306111
PCMD067512	KGO54407	MDP0000306111
PCMD067513	KGO54421	MDP0000306111
PCMD067514	KGO54663	MDP0000306111
PCMD067515	KGO55310	MDP0000306111
PCMD067516	KGO55473	MDP0000306111
PCMD067517	KGO55917	MDP0000306111
PCMD067518	KGO56042	MDP0000306111
PCMD067519	KGO56098	MDP0000306111
PCMD067520	KGO58681	MDP0000306111
PCMD067521	KGO58706	MDP0000306111
PCMD067522	KGO59080	MDP0000306111
PCMD067523	KGO59247	MDP0000306111
PCMD067524	KGO60685	MDP0000306111
PCMD067525	KGO60876	MDP0000306111
PCMD067526	KGO61285	MDP0000306111
PCMD067527	KGO61597	MDP0000306111
PCMD067528	KGO61600	MDP0000306111
PCMD067529	KGO61611	MDP0000306111
PCMD067530	KGO61626	MDP0000306111
PCMD067531	KGO63446	MDP0000306111
PCMD067532	KGO63699	MDP0000306111
PCMD067533	KGO63759	MDP0000306111
PCMD067534	KGO63779	MDP0000306111
PCMD067535	KGO64520	MDP0000306111
PCMD067536	KGO64814	MDP0000306111
PCMD067537	KGO66139	MDP0000306111
PCMD067538	KGO66802	MDP0000306111
PCMD067539	KGO67082	MDP0000306111
PCMD067540	KGO67174	MDP0000306111
PCMD067541	KGO68698	MDP0000306111
PCMD067542	KGO69130	MDP0000306111
PCMD067543	KGO70026	MDP0000306111
PCMD067544	KGO70105	MDP0000306111
PCMD067545	KGO70634	MDP0000306111
PCMD067546	KGO70733	MDP0000306111
PCMD067547	KGO71047	MDP0000306111
PCMD067548	KGO71061	MDP0000306111
PCMD067549	KGO71369	MDP0000306111
PCMD067550	KGO71409	MDP0000306111
PCMD067551	KGO71849	MDP0000306111
PCMD067552	KGO72825	MDP0000306111
PCMD067553	KGO73019	MDP0000306111
PCMD067554	KGO73457	MDP0000306111
PCMD067555	KGO73511	MDP0000306111
PCMD067556	KGO73617	MDP0000306111
PCMD072194	KGO70733	MDP0000320123
PCMD076765	KGO35970	MDP0000426154
PCMD076766	KGO36255	MDP0000426154
PCMD076767	KGO36262	MDP0000426154
PCMD076768	KGO36498	MDP0000426154
PCMD076769	KGO37071	MDP0000426154
PCMD076770	KGO37385	MDP0000426154
PCMD076771	KGO37457	MDP0000426154
PCMD076772	KGO37680	MDP0000426154
PCMD076773	KGO38190	MDP0000426154
PCMD076774	KGO38289	MDP0000426154
PCMD076775	KGO40389	MDP0000426154
PCMD076776	KGO40714	MDP0000426154
PCMD076777	KGO40841	MDP0000426154
PCMD076778	KGO43463	MDP0000426154
PCMD076779	KGO43741	MDP0000426154
PCMD076780	KGO44751	MDP0000426154
PCMD076781	KGO44775	MDP0000426154
PCMD076782	KGO46335	MDP0000426154
PCMD076783	KGO47104	MDP0000426154
PCMD076784	KGO47126	MDP0000426154
PCMD076785	KGO47303	MDP0000426154
PCMD076786	KGO47494	MDP0000426154
PCMD076787	KGO48908	MDP0000426154
PCMD076788	KGO49326	MDP0000426154
PCMD076789	KGO50010	MDP0000426154
PCMD076790	KGO50035	MDP0000426154
PCMD076791	KGO50759	MDP0000426154
PCMD076792	KGO50798	MDP0000426154
PCMD076793	KGO50864	MDP0000426154
PCMD076794	KGO50877	MDP0000426154
PCMD076795	KGO51569	MDP0000426154
PCMD076796	KGO51863	MDP0000426154
PCMD076797	KGO53623	MDP0000426154
PCMD076798	KGO54407	MDP0000426154
PCMD076799	KGO54421	MDP0000426154
PCMD076800	KGO54663	MDP0000426154
PCMD076801	KGO55310	MDP0000426154
PCMD076802	KGO55473	MDP0000426154
PCMD076803	KGO55917	MDP0000426154
PCMD076804	KGO56042	MDP0000426154
PCMD076805	KGO56098	MDP0000426154
PCMD076806	KGO58681	MDP0000426154
PCMD076807	KGO58706	MDP0000426154
PCMD076808	KGO59080	MDP0000426154
PCMD076809	KGO59247	MDP0000426154
PCMD076810	KGO60685	MDP0000426154
PCMD076811	KGO60876	MDP0000426154
PCMD076812	KGO61285	MDP0000426154
PCMD076813	KGO61597	MDP0000426154
PCMD076814	KGO61600	MDP0000426154
PCMD076815	KGO61611	MDP0000426154
PCMD076816	KGO61626	MDP0000426154
PCMD076817	KGO63446	MDP0000426154
PCMD076818	KGO63699	MDP0000426154
PCMD076819	KGO63759	MDP0000426154
PCMD076820	KGO63779	MDP0000426154
PCMD076821	KGO64520	MDP0000426154
PCMD076822	KGO64814	MDP0000426154
PCMD076823	KGO66139	MDP0000426154
PCMD076824	KGO66802	MDP0000426154
PCMD076825	KGO67082	MDP0000426154
PCMD076826	KGO67174	MDP0000426154
PCMD076827	KGO68698	MDP0000426154
PCMD076828	KGO69130	MDP0000426154
PCMD076829	KGO70026	MDP0000426154
PCMD076830	KGO70105	MDP0000426154
PCMD076831	KGO70634	MDP0000426154
PCMD076832	KGO70733	MDP0000426154
PCMD076833	KGO71047	MDP0000426154
PCMD076834	KGO71061	MDP0000426154
PCMD076835	KGO71369	MDP0000426154
PCMD076836	KGO71409	MDP0000426154
PCMD076837	KGO71849	MDP0000426154
PCMD076838	KGO72825	MDP0000426154
PCMD076839	KGO73019	MDP0000426154
PCMD076840	KGO73457	MDP0000426154
PCMD076841	KGO73511	MDP0000426154
PCMD076842	KGO73617	MDP0000426154
PCMD086693	KGO35970	MDP0000656197
PCMD086694	KGO36255	MDP0000656197
PCMD086695	KGO36262	MDP0000656197
PCMD086696	KGO36498	MDP0000656197
PCMD086697	KGO37071	MDP0000656197
PCMD086698	KGO37385	MDP0000656197
PCMD086699	KGO37457	MDP0000656197
PCMD086700	KGO37680	MDP0000656197
PCMD086701	KGO38190	MDP0000656197
PCMD086702	KGO38289	MDP0000656197
PCMD086703	KGO40389	MDP0000656197
PCMD086704	KGO40714	MDP0000656197
PCMD086705	KGO40841	MDP0000656197
PCMD086706	KGO43463	MDP0000656197
PCMD086707	KGO43741	MDP0000656197
PCMD086708	KGO44751	MDP0000656197
PCMD086709	KGO44775	MDP0000656197
PCMD086710	KGO46335	MDP0000656197
PCMD086711	KGO47104	MDP0000656197
PCMD086712	KGO47126	MDP0000656197
PCMD086713	KGO47303	MDP0000656197
PCMD086714	KGO47494	MDP0000656197
PCMD086715	KGO48908	MDP0000656197
PCMD086716	KGO49326	MDP0000656197
PCMD086717	KGO50010	MDP0000656197
PCMD086718	KGO50035	MDP0000656197
PCMD086719	KGO50759	MDP0000656197
PCMD086720	KGO50798	MDP0000656197
PCMD086721	KGO50864	MDP0000656197
PCMD086722	KGO50877	MDP0000656197
PCMD086723	KGO51569	MDP0000656197
PCMD086724	KGO51863	MDP0000656197
PCMD086725	KGO53623	MDP0000656197
PCMD086726	KGO54407	MDP0000656197
PCMD086727	KGO54421	MDP0000656197
PCMD086728	KGO54663	MDP0000656197
PCMD086729	KGO55310	MDP0000656197
PCMD086730	KGO55473	MDP0000656197
PCMD086731	KGO55917	MDP0000656197
PCMD086732	KGO56042	MDP0000656197
PCMD086733	KGO56098	MDP0000656197
PCMD086734	KGO58681	MDP0000656197
PCMD086735	KGO58706	MDP0000656197
PCMD086736	KGO59080	MDP0000656197
PCMD086737	KGO59247	MDP0000656197
PCMD086738	KGO60685	MDP0000656197
PCMD086739	KGO60876	MDP0000656197
PCMD086740	KGO61285	MDP0000656197
PCMD086741	KGO61597	MDP0000656197
PCMD086742	KGO61600	MDP0000656197
PCMD086743	KGO61611	MDP0000656197
PCMD086744	KGO61626	MDP0000656197
PCMD086745	KGO63446	MDP0000656197
PCMD086746	KGO63699	MDP0000656197
PCMD086747	KGO63759	MDP0000656197
PCMD086748	KGO63779	MDP0000656197
PCMD086749	KGO64520	MDP0000656197
PCMD086750	KGO64814	MDP0000656197
PCMD086751	KGO66139	MDP0000656197
PCMD086752	KGO66802	MDP0000656197
PCMD086753	KGO67082	MDP0000656197
PCMD086754	KGO67174	MDP0000656197
PCMD086755	KGO68698	MDP0000656197
PCMD086756	KGO69130	MDP0000656197
PCMD086757	KGO70026	MDP0000656197
PCMD086758	KGO70105	MDP0000656197
PCMD086759	KGO70634	MDP0000656197
PCMD086760	KGO70733	MDP0000656197
PCMD086761	KGO71047	MDP0000656197
PCMD086762	KGO71061	MDP0000656197
PCMD086763	KGO71369	MDP0000656197
PCMD086764	KGO71409	MDP0000656197
PCMD086765	KGO71849	MDP0000656197
PCMD086766	KGO72825	MDP0000656197
PCMD086767	KGO73019	MDP0000656197
PCMD086768	KGO73457	MDP0000656197
PCMD086769	KGO73511	MDP0000656197
PCMD086770	KGO73617	MDP0000656197
PCMD087962	KGO68698	MDP0000681106
PCMD087963	KGO70733	MDP0000681106
PCAC100667	KGO68698	Ach00g025351.1
PCAC100668	KGO70733	Ach00g025351.1
PCAC104897	KGO35970	Ach00g254361.2
PCAC104898	KGO36255	Ach00g254361.2
PCAC104899	KGO36262	Ach00g254361.2
PCAC104900	KGO36498	Ach00g254361.2
PCAC104901	KGO37071	Ach00g254361.2
PCAC104902	KGO37385	Ach00g254361.2
PCAC104903	KGO37457	Ach00g254361.2
PCAC104904	KGO37680	Ach00g254361.2
PCAC104905	KGO38190	Ach00g254361.2
PCAC104906	KGO38289	Ach00g254361.2
PCAC104907	KGO40389	Ach00g254361.2
PCAC104908	KGO40714	Ach00g254361.2
PCAC104909	KGO40841	Ach00g254361.2
PCAC104910	KGO43463	Ach00g254361.2
PCAC104911	KGO43741	Ach00g254361.2
PCAC104912	KGO44751	Ach00g254361.2
PCAC104913	KGO44775	Ach00g254361.2
PCAC104914	KGO46335	Ach00g254361.2
PCAC104915	KGO47104	Ach00g254361.2
PCAC104916	KGO47126	Ach00g254361.2
PCAC104917	KGO47303	Ach00g254361.2
PCAC104918	KGO47494	Ach00g254361.2
PCAC104919	KGO48908	Ach00g254361.2
PCAC104920	KGO49326	Ach00g254361.2
PCAC104921	KGO50010	Ach00g254361.2
PCAC104922	KGO50035	Ach00g254361.2
PCAC104923	KGO50759	Ach00g254361.2
PCAC104924	KGO50798	Ach00g254361.2
PCAC104925	KGO50864	Ach00g254361.2
PCAC104926	KGO50877	Ach00g254361.2
PCAC104927	KGO51569	Ach00g254361.2
PCAC104928	KGO51863	Ach00g254361.2
PCAC104929	KGO53623	Ach00g254361.2
PCAC104930	KGO54407	Ach00g254361.2
PCAC104931	KGO54421	Ach00g254361.2
PCAC104932	KGO54663	Ach00g254361.2
PCAC104933	KGO55310	Ach00g254361.2
PCAC104934	KGO55473	Ach00g254361.2
PCAC104935	KGO55917	Ach00g254361.2
PCAC104936	KGO56042	Ach00g254361.2
PCAC104937	KGO56098	Ach00g254361.2
PCAC104938	KGO58681	Ach00g254361.2
PCAC104939	KGO58706	Ach00g254361.2
PCAC104940	KGO59080	Ach00g254361.2
PCAC104941	KGO59247	Ach00g254361.2
PCAC104942	KGO60685	Ach00g254361.2
PCAC104943	KGO60876	Ach00g254361.2
PCAC104944	KGO61285	Ach00g254361.2
PCAC104945	KGO61597	Ach00g254361.2
PCAC104946	KGO61600	Ach00g254361.2
PCAC104947	KGO61611	Ach00g254361.2
PCAC104948	KGO61626	Ach00g254361.2
PCAC104949	KGO63446	Ach00g254361.2
PCAC104950	KGO63699	Ach00g254361.2
PCAC104951	KGO63759	Ach00g254361.2
PCAC104952	KGO63779	Ach00g254361.2
PCAC104953	KGO64520	Ach00g254361.2
PCAC104954	KGO64814	Ach00g254361.2
PCAC104955	KGO66139	Ach00g254361.2
PCAC104956	KGO66802	Ach00g254361.2
PCAC104957	KGO67082	Ach00g254361.2
PCAC104958	KGO67174	Ach00g254361.2
PCAC104959	KGO69130	Ach00g254361.2
PCAC104960	KGO70026	Ach00g254361.2
PCAC104961	KGO70105	Ach00g254361.2
PCAC104962	KGO70634	Ach00g254361.2
PCAC104963	KGO70733	Ach00g254361.2
PCAC104964	KGO71047	Ach00g254361.2
PCAC104965	KGO71061	Ach00g254361.2
PCAC104966	KGO71369	Ach00g254361.2
PCAC104967	KGO71409	Ach00g254361.2
PCAC104968	KGO71849	Ach00g254361.2
PCAC104969	KGO72825	Ach00g254361.2
PCAC104970	KGO73019	Ach00g254361.2
PCAC104971	KGO73457	Ach00g254361.2
PCAC104972	KGO73511	Ach00g254361.2
PCAC104973	KGO73617	Ach00g254361.2
PCAC105052	KGO68698	Ach00g260131.2
PCAC105053	KGO70733	Ach00g260131.2
PCAC119172	KGO35970	Ach07g074271.2
PCAC119173	KGO36255	Ach07g074271.2
PCAC119174	KGO36262	Ach07g074271.2
PCAC119175	KGO36498	Ach07g074271.2
PCAC119176	KGO37071	Ach07g074271.2
PCAC119177	KGO37385	Ach07g074271.2
PCAC119178	KGO37457	Ach07g074271.2
PCAC119179	KGO37680	Ach07g074271.2
PCAC119180	KGO38190	Ach07g074271.2
PCAC119181	KGO38289	Ach07g074271.2
PCAC119182	KGO40389	Ach07g074271.2
PCAC119183	KGO40714	Ach07g074271.2
PCAC119184	KGO40841	Ach07g074271.2
PCAC119185	KGO43463	Ach07g074271.2
PCAC119186	KGO43741	Ach07g074271.2
PCAC119187	KGO44751	Ach07g074271.2
PCAC119188	KGO44775	Ach07g074271.2
PCAC119189	KGO46335	Ach07g074271.2
PCAC119190	KGO47104	Ach07g074271.2
PCAC119191	KGO47126	Ach07g074271.2
PCAC119192	KGO47303	Ach07g074271.2
PCAC119193	KGO47494	Ach07g074271.2
PCAC119194	KGO48908	Ach07g074271.2
PCAC119195	KGO49326	Ach07g074271.2
PCAC119196	KGO50010	Ach07g074271.2
PCAC119197	KGO50035	Ach07g074271.2
PCAC119198	KGO50759	Ach07g074271.2
PCAC119199	KGO50798	Ach07g074271.2
PCAC119200	KGO50864	Ach07g074271.2
PCAC119201	KGO50877	Ach07g074271.2
PCAC119202	KGO51569	Ach07g074271.2
PCAC119203	KGO51863	Ach07g074271.2
PCAC119204	KGO53623	Ach07g074271.2
PCAC119205	KGO54407	Ach07g074271.2
PCAC119206	KGO54421	Ach07g074271.2
PCAC119207	KGO54663	Ach07g074271.2
PCAC119208	KGO55310	Ach07g074271.2
PCAC119209	KGO55473	Ach07g074271.2
PCAC119210	KGO55917	Ach07g074271.2
PCAC119211	KGO56042	Ach07g074271.2
PCAC119212	KGO56098	Ach07g074271.2
PCAC119213	KGO58681	Ach07g074271.2
PCAC119214	KGO58706	Ach07g074271.2
PCAC119215	KGO59080	Ach07g074271.2
PCAC119216	KGO59247	Ach07g074271.2
PCAC119217	KGO60685	Ach07g074271.2
PCAC119218	KGO60876	Ach07g074271.2
PCAC119219	KGO61285	Ach07g074271.2
PCAC119220	KGO61597	Ach07g074271.2
PCAC119221	KGO61600	Ach07g074271.2
PCAC119222	KGO61611	Ach07g074271.2
PCAC119223	KGO61626	Ach07g074271.2
PCAC119224	KGO63446	Ach07g074271.2
PCAC119225	KGO63699	Ach07g074271.2
PCAC119226	KGO63759	Ach07g074271.2
PCAC119227	KGO63779	Ach07g074271.2
PCAC119228	KGO64520	Ach07g074271.2
PCAC119229	KGO64814	Ach07g074271.2
PCAC119230	KGO66139	Ach07g074271.2
PCAC119231	KGO66802	Ach07g074271.2
PCAC119232	KGO67082	Ach07g074271.2
PCAC119233	KGO67174	Ach07g074271.2
PCAC119234	KGO68698	Ach07g074271.2
PCAC119235	KGO69130	Ach07g074271.2
PCAC119236	KGO70026	Ach07g074271.2
PCAC119237	KGO70105	Ach07g074271.2
PCAC119238	KGO70634	Ach07g074271.2
PCAC119239	KGO70733	Ach07g074271.2
PCAC119240	KGO71047	Ach07g074271.2
PCAC119241	KGO71061	Ach07g074271.2
PCAC119242	KGO71369	Ach07g074271.2
PCAC119243	KGO71409	Ach07g074271.2
PCAC119244	KGO71849	Ach07g074271.2
PCAC119245	KGO72825	Ach07g074271.2
PCAC119246	KGO73019	Ach07g074271.2
PCAC119247	KGO73457	Ach07g074271.2
PCAC119248	KGO73511	Ach07g074271.2
PCAC119249	KGO73617	Ach07g074271.2
PCAC125232	KGO35970	Ach11g050751.1
PCAC125233	KGO36255	Ach11g050751.1
PCAC125234	KGO36262	Ach11g050751.1
PCAC125235	KGO36498	Ach11g050751.1
PCAC125236	KGO37071	Ach11g050751.1
PCAC125237	KGO37385	Ach11g050751.1
PCAC125238	KGO37457	Ach11g050751.1
PCAC125239	KGO37680	Ach11g050751.1
PCAC125240	KGO38190	Ach11g050751.1
PCAC125241	KGO38289	Ach11g050751.1
PCAC125242	KGO40389	Ach11g050751.1
PCAC125243	KGO40714	Ach11g050751.1
PCAC125244	KGO40841	Ach11g050751.1
PCAC125245	KGO43463	Ach11g050751.1
PCAC125246	KGO43741	Ach11g050751.1
PCAC125247	KGO44751	Ach11g050751.1
PCAC125248	KGO44775	Ach11g050751.1
PCAC125249	KGO46335	Ach11g050751.1
PCAC125250	KGO47104	Ach11g050751.1
PCAC125251	KGO47126	Ach11g050751.1
PCAC125252	KGO47303	Ach11g050751.1
PCAC125253	KGO47494	Ach11g050751.1
PCAC125254	KGO48908	Ach11g050751.1
PCAC125255	KGO49326	Ach11g050751.1
PCAC125256	KGO50010	Ach11g050751.1
PCAC125257	KGO50035	Ach11g050751.1
PCAC125258	KGO50759	Ach11g050751.1
PCAC125259	KGO50798	Ach11g050751.1
PCAC125260	KGO50864	Ach11g050751.1
PCAC125261	KGO50877	Ach11g050751.1
PCAC125262	KGO51569	Ach11g050751.1
PCAC125263	KGO51863	Ach11g050751.1
PCAC125264	KGO53623	Ach11g050751.1
PCAC125265	KGO54407	Ach11g050751.1
PCAC125266	KGO54421	Ach11g050751.1
PCAC125267	KGO54663	Ach11g050751.1
PCAC125268	KGO55310	Ach11g050751.1
PCAC125269	KGO55473	Ach11g050751.1
PCAC125270	KGO55917	Ach11g050751.1
PCAC125271	KGO56042	Ach11g050751.1
PCAC125272	KGO56098	Ach11g050751.1
PCAC125273	KGO58681	Ach11g050751.1
PCAC125274	KGO58706	Ach11g050751.1
PCAC125275	KGO59080	Ach11g050751.1
PCAC125276	KGO59247	Ach11g050751.1
PCAC125277	KGO60685	Ach11g050751.1
PCAC125278	KGO60876	Ach11g050751.1
PCAC125279	KGO61285	Ach11g050751.1
PCAC125280	KGO61597	Ach11g050751.1
PCAC125281	KGO61600	Ach11g050751.1
PCAC125282	KGO61611	Ach11g050751.1
PCAC125283	KGO61626	Ach11g050751.1
PCAC125284	KGO63446	Ach11g050751.1
PCAC125285	KGO63699	Ach11g050751.1
PCAC125286	KGO63759	Ach11g050751.1
PCAC125287	KGO63779	Ach11g050751.1
PCAC125288	KGO64520	Ach11g050751.1
PCAC125289	KGO64814	Ach11g050751.1
PCAC125290	KGO66139	Ach11g050751.1
PCAC125291	KGO66802	Ach11g050751.1
PCAC125292	KGO67082	Ach11g050751.1
PCAC125293	KGO67174	Ach11g050751.1
PCAC125294	KGO69130	Ach11g050751.1
PCAC125295	KGO70026	Ach11g050751.1
PCAC125296	KGO70105	Ach11g050751.1
PCAC125297	KGO70634	Ach11g050751.1
PCAC125298	KGO71047	Ach11g050751.1
PCAC125299	KGO71061	Ach11g050751.1
PCAC125300	KGO71369	Ach11g050751.1
PCAC125301	KGO71409	Ach11g050751.1
PCAC125302	KGO71849	Ach11g050751.1
PCAC125303	KGO72825	Ach11g050751.1
PCAC125304	KGO73019	Ach11g050751.1
PCAC125305	KGO73457	Ach11g050751.1
PCAC125306	KGO73511	Ach11g050751.1
PCAC125307	KGO73617	Ach11g050751.1
PCAC132105	KGO35970	Ach16g216391.2
PCAC132106	KGO36255	Ach16g216391.2
PCAC132107	KGO36262	Ach16g216391.2
PCAC132108	KGO36498	Ach16g216391.2
PCAC132109	KGO37071	Ach16g216391.2
PCAC132110	KGO37385	Ach16g216391.2
PCAC132111	KGO37457	Ach16g216391.2
PCAC132112	KGO37680	Ach16g216391.2
PCAC132113	KGO38190	Ach16g216391.2
PCAC132114	KGO38289	Ach16g216391.2
PCAC132115	KGO40389	Ach16g216391.2
PCAC132116	KGO40714	Ach16g216391.2
PCAC132117	KGO40841	Ach16g216391.2
PCAC132118	KGO43463	Ach16g216391.2
PCAC132119	KGO43741	Ach16g216391.2
PCAC132120	KGO44751	Ach16g216391.2
PCAC132121	KGO44775	Ach16g216391.2
PCAC132122	KGO46335	Ach16g216391.2
PCAC132123	KGO47104	Ach16g216391.2
PCAC132124	KGO47126	Ach16g216391.2
PCAC132125	KGO47303	Ach16g216391.2
PCAC132126	KGO47494	Ach16g216391.2
PCAC132127	KGO48908	Ach16g216391.2
PCAC132128	KGO49326	Ach16g216391.2
PCAC132129	KGO50010	Ach16g216391.2
PCAC132130	KGO50035	Ach16g216391.2
PCAC132131	KGO50759	Ach16g216391.2
PCAC132132	KGO50798	Ach16g216391.2
PCAC132133	KGO50864	Ach16g216391.2
PCAC132134	KGO50877	Ach16g216391.2
PCAC132135	KGO51569	Ach16g216391.2
PCAC132136	KGO51863	Ach16g216391.2
PCAC132137	KGO53623	Ach16g216391.2
PCAC132138	KGO54407	Ach16g216391.2
PCAC132139	KGO54421	Ach16g216391.2
PCAC132140	KGO54663	Ach16g216391.2
PCAC132141	KGO55310	Ach16g216391.2
PCAC132142	KGO55473	Ach16g216391.2
PCAC132143	KGO55917	Ach16g216391.2
PCAC132144	KGO56042	Ach16g216391.2
PCAC132145	KGO56098	Ach16g216391.2
PCAC132146	KGO58681	Ach16g216391.2
PCAC132147	KGO58706	Ach16g216391.2
PCAC132148	KGO59080	Ach16g216391.2
PCAC132149	KGO59247	Ach16g216391.2
PCAC132150	KGO60685	Ach16g216391.2
PCAC132151	KGO60876	Ach16g216391.2
PCAC132152	KGO61285	Ach16g216391.2
PCAC132153	KGO61597	Ach16g216391.2
PCAC132154	KGO61600	Ach16g216391.2
PCAC132155	KGO61611	Ach16g216391.2
PCAC132156	KGO61626	Ach16g216391.2
PCAC132157	KGO63446	Ach16g216391.2
PCAC132158	KGO63699	Ach16g216391.2
PCAC132159	KGO63759	Ach16g216391.2
PCAC132160	KGO63779	Ach16g216391.2
PCAC132161	KGO64520	Ach16g216391.2
PCAC132162	KGO64814	Ach16g216391.2
PCAC132163	KGO66139	Ach16g216391.2
PCAC132164	KGO66802	Ach16g216391.2
PCAC132165	KGO67082	Ach16g216391.2
PCAC132166	KGO67174	Ach16g216391.2
PCAC132167	KGO69130	Ach16g216391.2
PCAC132168	KGO70026	Ach16g216391.2
PCAC132169	KGO70105	Ach16g216391.2
PCAC132170	KGO70634	Ach16g216391.2
PCAC132171	KGO71047	Ach16g216391.2
PCAC132172	KGO71061	Ach16g216391.2
PCAC132173	KGO71369	Ach16g216391.2
PCAC132174	KGO71409	Ach16g216391.2
PCAC132175	KGO71849	Ach16g216391.2
PCAC132176	KGO72825	Ach16g216391.2
PCAC132177	KGO73019	Ach16g216391.2
PCAC132178	KGO73457	Ach16g216391.2
PCAC132179	KGO73511	Ach16g216391.2
PCAC132180	KGO73617	Ach16g216391.2
PCAC134951	KGO35970	Ach18g473551.2
PCAC134952	KGO36255	Ach18g473551.2
PCAC134953	KGO36262	Ach18g473551.2
PCAC134954	KGO36498	Ach18g473551.2
PCAC134955	KGO37071	Ach18g473551.2
PCAC134956	KGO37385	Ach18g473551.2
PCAC134957	KGO37457	Ach18g473551.2
PCAC134958	KGO37680	Ach18g473551.2
PCAC134959	KGO38190	Ach18g473551.2
PCAC134960	KGO38289	Ach18g473551.2
PCAC134961	KGO40389	Ach18g473551.2
PCAC134962	KGO40714	Ach18g473551.2
PCAC134963	KGO40841	Ach18g473551.2
PCAC134964	KGO43463	Ach18g473551.2
PCAC134965	KGO43741	Ach18g473551.2
PCAC134966	KGO44751	Ach18g473551.2
PCAC134967	KGO44775	Ach18g473551.2
PCAC134968	KGO46335	Ach18g473551.2
PCAC134969	KGO47104	Ach18g473551.2
PCAC134970	KGO47126	Ach18g473551.2
PCAC134971	KGO47303	Ach18g473551.2
PCAC134972	KGO47494	Ach18g473551.2
PCAC134973	KGO48908	Ach18g473551.2
PCAC134974	KGO49326	Ach18g473551.2
PCAC134975	KGO50010	Ach18g473551.2
PCAC134976	KGO50035	Ach18g473551.2
PCAC134977	KGO50759	Ach18g473551.2
PCAC134978	KGO50798	Ach18g473551.2
PCAC134979	KGO50864	Ach18g473551.2
PCAC134980	KGO50877	Ach18g473551.2
PCAC134981	KGO51569	Ach18g473551.2
PCAC134982	KGO51863	Ach18g473551.2
PCAC134983	KGO53623	Ach18g473551.2
PCAC134984	KGO54407	Ach18g473551.2
PCAC134985	KGO54421	Ach18g473551.2
PCAC134986	KGO54663	Ach18g473551.2
PCAC134987	KGO55310	Ach18g473551.2
PCAC134988	KGO55473	Ach18g473551.2
PCAC134989	KGO55917	Ach18g473551.2
PCAC134990	KGO56042	Ach18g473551.2
PCAC134991	KGO56098	Ach18g473551.2
PCAC134992	KGO58681	Ach18g473551.2
PCAC134993	KGO58706	Ach18g473551.2
PCAC134994	KGO59080	Ach18g473551.2
PCAC134995	KGO59247	Ach18g473551.2
PCAC134996	KGO60685	Ach18g473551.2
PCAC134997	KGO60876	Ach18g473551.2
PCAC134998	KGO61285	Ach18g473551.2
PCAC134999	KGO61597	Ach18g473551.2
PCAC135000	KGO61600	Ach18g473551.2
PCAC135001	KGO61611	Ach18g473551.2
PCAC135002	KGO61626	Ach18g473551.2
PCAC135003	KGO63446	Ach18g473551.2
PCAC135004	KGO63699	Ach18g473551.2
PCAC135005	KGO63759	Ach18g473551.2
PCAC135006	KGO63779	Ach18g473551.2
PCAC135007	KGO64520	Ach18g473551.2
PCAC135008	KGO64814	Ach18g473551.2
PCAC135009	KGO66139	Ach18g473551.2
PCAC135010	KGO66802	Ach18g473551.2
PCAC135011	KGO67082	Ach18g473551.2
PCAC135012	KGO67174	Ach18g473551.2
PCAC135013	KGO68698	Ach18g473551.2
PCAC135014	KGO69130	Ach18g473551.2
PCAC135015	KGO70026	Ach18g473551.2
PCAC135016	KGO70105	Ach18g473551.2
PCAC135017	KGO70634	Ach18g473551.2
PCAC135018	KGO70733	Ach18g473551.2
PCAC135019	KGO71047	Ach18g473551.2
PCAC135020	KGO71061	Ach18g473551.2
PCAC135021	KGO71369	Ach18g473551.2
PCAC135022	KGO71409	Ach18g473551.2
PCAC135023	KGO71849	Ach18g473551.2
PCAC135024	KGO72825	Ach18g473551.2
PCAC135025	KGO73019	Ach18g473551.2
PCAC135026	KGO73457	Ach18g473551.2
PCAC135027	KGO73511	Ach18g473551.2
PCAC135028	KGO73617	Ach18g473551.2
PCAC147313	KGO70733	Ach26g280831.2
PCZM158471	KGO35970	GRMZM2G022645_P01
PCZM158472	KGO36255	GRMZM2G022645_P01
PCZM158473	KGO36262	GRMZM2G022645_P01
PCZM158474	KGO36498	GRMZM2G022645_P01
PCZM158475	KGO37071	GRMZM2G022645_P01
PCZM158476	KGO37385	GRMZM2G022645_P01
PCZM158477	KGO37457	GRMZM2G022645_P01
PCZM158478	KGO37680	GRMZM2G022645_P01
PCZM158479	KGO38190	GRMZM2G022645_P01
PCZM158480	KGO38289	GRMZM2G022645_P01
PCZM158481	KGO40389	GRMZM2G022645_P01
PCZM158482	KGO40714	GRMZM2G022645_P01
PCZM158483	KGO40841	GRMZM2G022645_P01
PCZM158484	KGO43463	GRMZM2G022645_P01
PCZM158485	KGO43741	GRMZM2G022645_P01
PCZM158486	KGO44751	GRMZM2G022645_P01
PCZM158487	KGO44775	GRMZM2G022645_P01
PCZM158488	KGO46335	GRMZM2G022645_P01
PCZM158489	KGO47104	GRMZM2G022645_P01
PCZM158490	KGO47126	GRMZM2G022645_P01
PCZM158491	KGO47303	GRMZM2G022645_P01
PCZM158492	KGO47494	GRMZM2G022645_P01
PCZM158493	KGO48908	GRMZM2G022645_P01
PCZM158494	KGO49326	GRMZM2G022645_P01
PCZM158495	KGO50010	GRMZM2G022645_P01
PCZM158496	KGO50035	GRMZM2G022645_P01
PCZM158497	KGO50759	GRMZM2G022645_P01
PCZM158498	KGO50798	GRMZM2G022645_P01
PCZM158499	KGO50864	GRMZM2G022645_P01
PCZM158500	KGO50877	GRMZM2G022645_P01
PCZM158501	KGO51569	GRMZM2G022645_P01
PCZM158502	KGO51863	GRMZM2G022645_P01
PCZM158503	KGO53623	GRMZM2G022645_P01
PCZM158504	KGO54407	GRMZM2G022645_P01
PCZM158505	KGO54421	GRMZM2G022645_P01
PCZM158506	KGO54663	GRMZM2G022645_P01
PCZM158507	KGO55310	GRMZM2G022645_P01
PCZM158508	KGO55473	GRMZM2G022645_P01
PCZM158509	KGO55917	GRMZM2G022645_P01
PCZM158510	KGO56042	GRMZM2G022645_P01
PCZM158511	KGO56098	GRMZM2G022645_P01
PCZM158512	KGO58681	GRMZM2G022645_P01
PCZM158513	KGO58706	GRMZM2G022645_P01
PCZM158514	KGO59080	GRMZM2G022645_P01
PCZM158515	KGO59247	GRMZM2G022645_P01
PCZM158516	KGO60685	GRMZM2G022645_P01
PCZM158517	KGO60876	GRMZM2G022645_P01
PCZM158518	KGO61285	GRMZM2G022645_P01
PCZM158519	KGO61597	GRMZM2G022645_P01
PCZM158520	KGO61600	GRMZM2G022645_P01
PCZM158521	KGO61611	GRMZM2G022645_P01
PCZM158522	KGO61626	GRMZM2G022645_P01
PCZM158523	KGO63446	GRMZM2G022645_P01
PCZM158524	KGO63699	GRMZM2G022645_P01
PCZM158525	KGO63759	GRMZM2G022645_P01
PCZM158526	KGO63779	GRMZM2G022645_P01
PCZM158527	KGO64520	GRMZM2G022645_P01
PCZM158528	KGO64814	GRMZM2G022645_P01
PCZM158529	KGO66139	GRMZM2G022645_P01
PCZM158530	KGO66802	GRMZM2G022645_P01
PCZM158531	KGO67082	GRMZM2G022645_P01
PCZM158532	KGO67174	GRMZM2G022645_P01
PCZM158533	KGO68698	GRMZM2G022645_P01
PCZM158534	KGO69130	GRMZM2G022645_P01
PCZM158535	KGO70026	GRMZM2G022645_P01
PCZM158536	KGO70105	GRMZM2G022645_P01
PCZM158537	KGO70634	GRMZM2G022645_P01
PCZM158538	KGO70733	GRMZM2G022645_P01
PCZM158539	KGO71047	GRMZM2G022645_P01
PCZM158540	KGO71061	GRMZM2G022645_P01
PCZM158541	KGO71369	GRMZM2G022645_P01
PCZM158542	KGO71409	GRMZM2G022645_P01
PCZM158543	KGO71849	GRMZM2G022645_P01
PCZM158544	KGO72825	GRMZM2G022645_P01
PCZM158545	KGO73019	GRMZM2G022645_P01
PCZM158546	KGO73457	GRMZM2G022645_P01
PCZM158547	KGO73511	GRMZM2G022645_P01
PCZM158548	KGO73617	GRMZM2G022645_P01
PCZM197427	KGO68698	GRMZM2G310840_P01
PCZM212247	KGO35970	GRMZM2G583971_P01
PCZM212248	KGO36255	GRMZM2G583971_P01
PCZM212249	KGO36262	GRMZM2G583971_P01
PCZM212250	KGO36498	GRMZM2G583971_P01
PCZM212251	KGO37071	GRMZM2G583971_P01
PCZM212252	KGO37385	GRMZM2G583971_P01
PCZM212253	KGO37457	GRMZM2G583971_P01
PCZM212254	KGO37680	GRMZM2G583971_P01
PCZM212255	KGO38190	GRMZM2G583971_P01
PCZM212256	KGO38289	GRMZM2G583971_P01
PCZM212257	KGO40389	GRMZM2G583971_P01
PCZM212258	KGO40714	GRMZM2G583971_P01
PCZM212259	KGO40841	GRMZM2G583971_P01
PCZM212260	KGO43463	GRMZM2G583971_P01
PCZM212261	KGO43741	GRMZM2G583971_P01
PCZM212262	KGO44751	GRMZM2G583971_P01
PCZM212263	KGO44775	GRMZM2G583971_P01
PCZM212264	KGO46335	GRMZM2G583971_P01
PCZM212265	KGO47104	GRMZM2G583971_P01
PCZM212266	KGO47126	GRMZM2G583971_P01
PCZM212267	KGO47303	GRMZM2G583971_P01
PCZM212268	KGO47494	GRMZM2G583971_P01
PCZM212269	KGO48908	GRMZM2G583971_P01
PCZM212270	KGO49326	GRMZM2G583971_P01
PCZM212271	KGO50010	GRMZM2G583971_P01
PCZM212272	KGO50035	GRMZM2G583971_P01
PCZM212273	KGO50759	GRMZM2G583971_P01
PCZM212274	KGO50798	GRMZM2G583971_P01
PCZM212275	KGO50864	GRMZM2G583971_P01
PCZM212276	KGO50877	GRMZM2G583971_P01
PCZM212277	KGO51569	GRMZM2G583971_P01
PCZM212278	KGO51863	GRMZM2G583971_P01
PCZM212279	KGO53623	GRMZM2G583971_P01
PCZM212280	KGO54407	GRMZM2G583971_P01
PCZM212281	KGO54421	GRMZM2G583971_P01
PCZM212282	KGO54663	GRMZM2G583971_P01
PCZM212283	KGO55310	GRMZM2G583971_P01
PCZM212284	KGO55473	GRMZM2G583971_P01
PCZM212285	KGO55917	GRMZM2G583971_P01
PCZM212286	KGO56042	GRMZM2G583971_P01
PCZM212287	KGO56098	GRMZM2G583971_P01
PCZM212288	KGO58681	GRMZM2G583971_P01
PCZM212289	KGO58706	GRMZM2G583971_P01
PCZM212290	KGO59080	GRMZM2G583971_P01
PCZM212291	KGO59247	GRMZM2G583971_P01
PCZM212292	KGO60685	GRMZM2G583971_P01
PCZM212293	KGO60876	GRMZM2G583971_P01
PCZM212294	KGO61285	GRMZM2G583971_P01
PCZM212295	KGO61597	GRMZM2G583971_P01
PCZM212296	KGO61600	GRMZM2G583971_P01
PCZM212297	KGO61611	GRMZM2G583971_P01
PCZM212298	KGO61626	GRMZM2G583971_P01
PCZM212299	KGO63446	GRMZM2G583971_P01
PCZM212300	KGO63699	GRMZM2G583971_P01
PCZM212301	KGO63759	GRMZM2G583971_P01
PCZM212302	KGO63779	GRMZM2G583971_P01
PCZM212303	KGO64520	GRMZM2G583971_P01
PCZM212304	KGO64814	GRMZM2G583971_P01
PCZM212305	KGO66139	GRMZM2G583971_P01
PCZM212306	KGO66802	GRMZM2G583971_P01
PCZM212307	KGO67082	GRMZM2G583971_P01
PCZM212308	KGO67174	GRMZM2G583971_P01
PCZM212309	KGO68698	GRMZM2G583971_P01
PCZM212310	KGO69130	GRMZM2G583971_P01
PCZM212311	KGO70026	GRMZM2G583971_P01
PCZM212312	KGO70105	GRMZM2G583971_P01
PCZM212313	KGO70634	GRMZM2G583971_P01
PCZM212314	KGO70733	GRMZM2G583971_P01
PCZM212315	KGO71047	GRMZM2G583971_P01
PCZM212316	KGO71061	GRMZM2G583971_P01
PCZM212317	KGO71369	GRMZM2G583971_P01
PCZM212318	KGO71409	GRMZM2G583971_P01
PCZM212319	KGO71849	GRMZM2G583971_P01
PCZM212320	KGO72825	GRMZM2G583971_P01
PCZM212321	KGO73019	GRMZM2G583971_P01
PCZM212322	KGO73457	GRMZM2G583971_P01
PCZM212323	KGO73511	GRMZM2G583971_P01
PCZM212324	KGO73617	GRMZM2G583971_P01
PCPC215740	KGO35970	PCP000222
PCPC215741	KGO36255	PCP000222
PCPC215742	KGO36262	PCP000222
PCPC215743	KGO36498	PCP000222
PCPC215744	KGO37071	PCP000222
PCPC215745	KGO37385	PCP000222
PCPC215746	KGO37457	PCP000222
PCPC215747	KGO37680	PCP000222
PCPC215748	KGO38190	PCP000222
PCPC215749	KGO38289	PCP000222
PCPC215750	KGO40389	PCP000222
PCPC215751	KGO40714	PCP000222
PCPC215752	KGO40841	PCP000222
PCPC215753	KGO43463	PCP000222
PCPC215754	KGO43741	PCP000222
PCPC215755	KGO44751	PCP000222
PCPC215756	KGO44775	PCP000222
PCPC215757	KGO46335	PCP000222
PCPC215758	KGO47104	PCP000222
PCPC215759	KGO47126	PCP000222
PCPC215760	KGO47303	PCP000222
PCPC215761	KGO47494	PCP000222
PCPC215762	KGO48908	PCP000222
PCPC215763	KGO49326	PCP000222
PCPC215764	KGO50010	PCP000222
PCPC215765	KGO50035	PCP000222
PCPC215766	KGO50759	PCP000222
PCPC215767	KGO50798	PCP000222
PCPC215768	KGO50864	PCP000222
PCPC215769	KGO50877	PCP000222
PCPC215770	KGO51569	PCP000222
PCPC215771	KGO51863	PCP000222
PCPC215772	KGO53623	PCP000222
PCPC215773	KGO54407	PCP000222
PCPC215774	KGO54421	PCP000222
PCPC215775	KGO54663	PCP000222
PCPC215776	KGO55310	PCP000222
PCPC215777	KGO55473	PCP000222
PCPC215778	KGO55917	PCP000222
PCPC215779	KGO56042	PCP000222
PCPC215780	KGO56098	PCP000222
PCPC215781	KGO58681	PCP000222
PCPC215782	KGO58706	PCP000222
PCPC215783	KGO59080	PCP000222
PCPC215784	KGO59247	PCP000222
PCPC215785	KGO60685	PCP000222
PCPC215786	KGO60876	PCP000222
PCPC215787	KGO61285	PCP000222
PCPC215788	KGO61597	PCP000222
PCPC215789	KGO61600	PCP000222
PCPC215790	KGO61611	PCP000222
PCPC215791	KGO61626	PCP000222
PCPC215792	KGO63446	PCP000222
PCPC215793	KGO63699	PCP000222
PCPC215794	KGO63759	PCP000222
PCPC215795	KGO63779	PCP000222
PCPC215796	KGO64520	PCP000222
PCPC215797	KGO64814	PCP000222
PCPC215798	KGO66139	PCP000222
PCPC215799	KGO66802	PCP000222
PCPC215800	KGO67082	PCP000222
PCPC215801	KGO67174	PCP000222
PCPC215802	KGO68698	PCP000222
PCPC215803	KGO69130	PCP000222
PCPC215804	KGO70026	PCP000222
PCPC215805	KGO70105	PCP000222
PCPC215806	KGO70634	PCP000222
PCPC215807	KGO70733	PCP000222
PCPC215808	KGO71047	PCP000222
PCPC215809	KGO71061	PCP000222
PCPC215810	KGO71369	PCP000222
PCPC215811	KGO71409	PCP000222
PCPC215812	KGO71849	PCP000222
PCPC215813	KGO72825	PCP000222
PCPC215814	KGO73019	PCP000222
PCPC215815	KGO73457	PCP000222
PCPC215816	KGO73511	PCP000222
PCPC215817	KGO73617	PCP000222
PCPC216133	KGO35970	PCP000376
PCPC216134	KGO36255	PCP000376
PCPC216135	KGO36262	PCP000376
PCPC216136	KGO36498	PCP000376
PCPC216137	KGO37071	PCP000376
PCPC216138	KGO37385	PCP000376
PCPC216139	KGO37457	PCP000376
PCPC216140	KGO37680	PCP000376
PCPC216141	KGO38190	PCP000376
PCPC216142	KGO38289	PCP000376
PCPC216143	KGO40389	PCP000376
PCPC216144	KGO40714	PCP000376
PCPC216145	KGO40841	PCP000376
PCPC216146	KGO43463	PCP000376
PCPC216147	KGO43741	PCP000376
PCPC216148	KGO44751	PCP000376
PCPC216149	KGO44775	PCP000376
PCPC216150	KGO46335	PCP000376
PCPC216151	KGO47104	PCP000376
PCPC216152	KGO47126	PCP000376
PCPC216153	KGO47303	PCP000376
PCPC216154	KGO47494	PCP000376
PCPC216155	KGO48908	PCP000376
PCPC216156	KGO49326	PCP000376
PCPC216157	KGO50010	PCP000376
PCPC216158	KGO50035	PCP000376
PCPC216159	KGO50759	PCP000376
PCPC216160	KGO50798	PCP000376
PCPC216161	KGO50864	PCP000376
PCPC216162	KGO50877	PCP000376
PCPC216163	KGO51569	PCP000376
PCPC216164	KGO51863	PCP000376
PCPC216165	KGO53623	PCP000376
PCPC216166	KGO54407	PCP000376
PCPC216167	KGO54421	PCP000376
PCPC216168	KGO54663	PCP000376
PCPC216169	KGO55310	PCP000376
PCPC216170	KGO55473	PCP000376
PCPC216171	KGO55917	PCP000376
PCPC216172	KGO56042	PCP000376
PCPC216173	KGO56098	PCP000376
PCPC216174	KGO58681	PCP000376
PCPC216175	KGO58706	PCP000376
PCPC216176	KGO59080	PCP000376
PCPC216177	KGO59247	PCP000376
PCPC216178	KGO60685	PCP000376
PCPC216179	KGO60876	PCP000376
PCPC216180	KGO61285	PCP000376
PCPC216181	KGO61597	PCP000376
PCPC216182	KGO61600	PCP000376
PCPC216183	KGO61611	PCP000376
PCPC216184	KGO61626	PCP000376
PCPC216185	KGO63446	PCP000376
PCPC216186	KGO63699	PCP000376
PCPC216187	KGO63759	PCP000376
PCPC216188	KGO63779	PCP000376
PCPC216189	KGO64520	PCP000376
PCPC216190	KGO64814	PCP000376
PCPC216191	KGO66139	PCP000376
PCPC216192	KGO66802	PCP000376
PCPC216193	KGO67082	PCP000376
PCPC216194	KGO67174	PCP000376
PCPC216195	KGO68698	PCP000376
PCPC216196	KGO69130	PCP000376
PCPC216197	KGO70026	PCP000376
PCPC216198	KGO70105	PCP000376
PCPC216199	KGO70634	PCP000376
PCPC216200	KGO70733	PCP000376
PCPC216201	KGO71047	PCP000376
PCPC216202	KGO71061	PCP000376
PCPC216203	KGO71369	PCP000376
PCPC216204	KGO71409	PCP000376
PCPC216205	KGO71849	PCP000376
PCPC216206	KGO72825	PCP000376
PCPC216207	KGO73019	PCP000376
PCPC216208	KGO73457	PCP000376
PCPC216209	KGO73511	PCP000376
PCPC216210	KGO73617	PCP000376
PCPC219386	KGO35970	PCP002145
PCPC219387	KGO36255	PCP002145
PCPC219388	KGO36262	PCP002145
PCPC219389	KGO36498	PCP002145
PCPC219390	KGO37071	PCP002145
PCPC219391	KGO37385	PCP002145
PCPC219392	KGO37457	PCP002145
PCPC219393	KGO37680	PCP002145
PCPC219394	KGO38190	PCP002145
PCPC219395	KGO38289	PCP002145
PCPC219396	KGO40389	PCP002145
PCPC219397	KGO40714	PCP002145
PCPC219398	KGO40841	PCP002145
PCPC219399	KGO43463	PCP002145
PCPC219400	KGO43741	PCP002145
PCPC219401	KGO44751	PCP002145
PCPC219402	KGO44775	PCP002145
PCPC219403	KGO46335	PCP002145
PCPC219404	KGO47104	PCP002145
PCPC219405	KGO47126	PCP002145
PCPC219406	KGO47303	PCP002145
PCPC219407	KGO47494	PCP002145
PCPC219408	KGO48908	PCP002145
PCPC219409	KGO49326	PCP002145
PCPC219410	KGO50010	PCP002145
PCPC219411	KGO50035	PCP002145
PCPC219412	KGO50759	PCP002145
PCPC219413	KGO50798	PCP002145
PCPC219414	KGO50864	PCP002145
PCPC219415	KGO50877	PCP002145
PCPC219416	KGO51569	PCP002145
PCPC219417	KGO51863	PCP002145
PCPC219418	KGO53623	PCP002145
PCPC219419	KGO54407	PCP002145
PCPC219420	KGO54421	PCP002145
PCPC219421	KGO54663	PCP002145
PCPC219422	KGO55310	PCP002145
PCPC219423	KGO55473	PCP002145
PCPC219424	KGO55917	PCP002145
PCPC219425	KGO56042	PCP002145
PCPC219426	KGO56098	PCP002145
PCPC219427	KGO58681	PCP002145
PCPC219428	KGO58706	PCP002145
PCPC219429	KGO59080	PCP002145
PCPC219430	KGO59247	PCP002145
PCPC219431	KGO60685	PCP002145
PCPC219432	KGO60876	PCP002145
PCPC219433	KGO61285	PCP002145
PCPC219434	KGO61597	PCP002145
PCPC219435	KGO61600	PCP002145
PCPC219436	KGO61611	PCP002145
PCPC219437	KGO61626	PCP002145
PCPC219438	KGO63446	PCP002145
PCPC219439	KGO63699	PCP002145
PCPC219440	KGO63759	PCP002145
PCPC219441	KGO63779	PCP002145
PCPC219442	KGO64520	PCP002145
PCPC219443	KGO64814	PCP002145
PCPC219444	KGO66139	PCP002145
PCPC219445	KGO66802	PCP002145
PCPC219446	KGO67082	PCP002145
PCPC219447	KGO67174	PCP002145
PCPC219448	KGO69130	PCP002145
PCPC219449	KGO70026	PCP002145
PCPC219450	KGO70105	PCP002145
PCPC219451	KGO70634	PCP002145
PCPC219452	KGO71047	PCP002145
PCPC219453	KGO71061	PCP002145
PCPC219454	KGO71369	PCP002145
PCPC219455	KGO71409	PCP002145
PCPC219456	KGO71849	PCP002145
PCPC219457	KGO72825	PCP002145
PCPC219458	KGO73019	PCP002145
PCPC219459	KGO73457	PCP002145
PCPC219460	KGO73511	PCP002145
PCPC219461	KGO73617	PCP002145
PCPC223976	KGO35970	PCP003981
PCPC223977	KGO36255	PCP003981
PCPC223978	KGO36262	PCP003981
PCPC223979	KGO36498	PCP003981
PCPC223980	KGO37071	PCP003981
PCPC223981	KGO37385	PCP003981
PCPC223982	KGO37457	PCP003981
PCPC223983	KGO37680	PCP003981
PCPC223984	KGO38190	PCP003981
PCPC223985	KGO38289	PCP003981
PCPC223986	KGO40389	PCP003981
PCPC223987	KGO40714	PCP003981
PCPC223988	KGO40841	PCP003981
PCPC223989	KGO43463	PCP003981
PCPC223990	KGO43741	PCP003981
PCPC223991	KGO44751	PCP003981
PCPC223992	KGO44775	PCP003981
PCPC223993	KGO46335	PCP003981
PCPC223994	KGO47104	PCP003981
PCPC223995	KGO47126	PCP003981
PCPC223996	KGO47303	PCP003981
PCPC223997	KGO47494	PCP003981
PCPC223998	KGO48908	PCP003981
PCPC223999	KGO49326	PCP003981
PCPC224000	KGO50010	PCP003981
PCPC224001	KGO50035	PCP003981
PCPC224002	KGO50759	PCP003981
PCPC224003	KGO50798	PCP003981
PCPC224004	KGO50864	PCP003981
PCPC224005	KGO50877	PCP003981
PCPC224006	KGO51569	PCP003981
PCPC224007	KGO51863	PCP003981
PCPC224008	KGO53623	PCP003981
PCPC224009	KGO54407	PCP003981
PCPC224010	KGO54421	PCP003981
PCPC224011	KGO54663	PCP003981
PCPC224012	KGO55310	PCP003981
PCPC224013	KGO55473	PCP003981
PCPC224014	KGO55917	PCP003981
PCPC224015	KGO56042	PCP003981
PCPC224016	KGO56098	PCP003981
PCPC224017	KGO58681	PCP003981
PCPC224018	KGO58706	PCP003981
PCPC224019	KGO59080	PCP003981
PCPC224020	KGO59247	PCP003981
PCPC224021	KGO60685	PCP003981
PCPC224022	KGO60876	PCP003981
PCPC224023	KGO61285	PCP003981
PCPC224024	KGO61597	PCP003981
PCPC224025	KGO61600	PCP003981
PCPC224026	KGO61611	PCP003981
PCPC224027	KGO61626	PCP003981
PCPC224028	KGO63446	PCP003981
PCPC224029	KGO63699	PCP003981
PCPC224030	KGO63759	PCP003981
PCPC224031	KGO63779	PCP003981
PCPC224032	KGO64520	PCP003981
PCPC224033	KGO64814	PCP003981
PCPC224034	KGO66139	PCP003981
PCPC224035	KGO66802	PCP003981
PCPC224036	KGO67082	PCP003981
PCPC224037	KGO67174	PCP003981
PCPC224038	KGO69130	PCP003981
PCPC224039	KGO70026	PCP003981
PCPC224040	KGO70105	PCP003981
PCPC224041	KGO70634	PCP003981
PCPC224042	KGO71047	PCP003981
PCPC224043	KGO71061	PCP003981
PCPC224044	KGO71369	PCP003981
PCPC224045	KGO71409	PCP003981
PCPC224046	KGO71849	PCP003981
PCPC224047	KGO72825	PCP003981
PCPC224048	KGO73019	PCP003981
PCPC224049	KGO73457	PCP003981
PCPC224050	KGO73511	PCP003981
PCPC224051	KGO73617	PCP003981
PCPC247349	KGO70733	PCP015994
PCFA377887	KGO35970	FANhyb_rscf00000845.1.g00002.1
PCFA377888	KGO36255	FANhyb_rscf00000845.1.g00002.1
PCFA377889	KGO36262	FANhyb_rscf00000845.1.g00002.1
PCFA377890	KGO36498	FANhyb_rscf00000845.1.g00002.1
PCFA377891	KGO37071	FANhyb_rscf00000845.1.g00002.1
PCFA377892	KGO37385	FANhyb_rscf00000845.1.g00002.1
PCFA377893	KGO37457	FANhyb_rscf00000845.1.g00002.1
PCFA377894	KGO37680	FANhyb_rscf00000845.1.g00002.1
PCFA377895	KGO38190	FANhyb_rscf00000845.1.g00002.1
PCFA377896	KGO38289	FANhyb_rscf00000845.1.g00002.1
PCFA377897	KGO40389	FANhyb_rscf00000845.1.g00002.1
PCFA377898	KGO40714	FANhyb_rscf00000845.1.g00002.1
PCFA377899	KGO40841	FANhyb_rscf00000845.1.g00002.1
PCFA377900	KGO43463	FANhyb_rscf00000845.1.g00002.1
PCFA377901	KGO43741	FANhyb_rscf00000845.1.g00002.1
PCFA377902	KGO44751	FANhyb_rscf00000845.1.g00002.1
PCFA377903	KGO44775	FANhyb_rscf00000845.1.g00002.1
PCFA377904	KGO46335	FANhyb_rscf00000845.1.g00002.1
PCFA377905	KGO47104	FANhyb_rscf00000845.1.g00002.1
PCFA377906	KGO47126	FANhyb_rscf00000845.1.g00002.1
PCFA377907	KGO47303	FANhyb_rscf00000845.1.g00002.1
PCFA377908	KGO47494	FANhyb_rscf00000845.1.g00002.1
PCFA377909	KGO48908	FANhyb_rscf00000845.1.g00002.1
PCFA377910	KGO49326	FANhyb_rscf00000845.1.g00002.1
PCFA377911	KGO50010	FANhyb_rscf00000845.1.g00002.1
PCFA377912	KGO50035	FANhyb_rscf00000845.1.g00002.1
PCFA377913	KGO50759	FANhyb_rscf00000845.1.g00002.1
PCFA377914	KGO50798	FANhyb_rscf00000845.1.g00002.1
PCFA377915	KGO50864	FANhyb_rscf00000845.1.g00002.1
PCFA377916	KGO50877	FANhyb_rscf00000845.1.g00002.1
PCFA377917	KGO51569	FANhyb_rscf00000845.1.g00002.1
PCFA377918	KGO51863	FANhyb_rscf00000845.1.g00002.1
PCFA377919	KGO53623	FANhyb_rscf00000845.1.g00002.1
PCFA377920	KGO54407	FANhyb_rscf00000845.1.g00002.1
PCFA377921	KGO54421	FANhyb_rscf00000845.1.g00002.1
PCFA377922	KGO54663	FANhyb_rscf00000845.1.g00002.1
PCFA377923	KGO55310	FANhyb_rscf00000845.1.g00002.1
PCFA377924	KGO55473	FANhyb_rscf00000845.1.g00002.1
PCFA377925	KGO55917	FANhyb_rscf00000845.1.g00002.1
PCFA377926	KGO56042	FANhyb_rscf00000845.1.g00002.1
PCFA377927	KGO56098	FANhyb_rscf00000845.1.g00002.1
PCFA377928	KGO58681	FANhyb_rscf00000845.1.g00002.1
PCFA377929	KGO58706	FANhyb_rscf00000845.1.g00002.1
PCFA377930	KGO59080	FANhyb_rscf00000845.1.g00002.1
PCFA377931	KGO59247	FANhyb_rscf00000845.1.g00002.1
PCFA377932	KGO60685	FANhyb_rscf00000845.1.g00002.1
PCFA377933	KGO60876	FANhyb_rscf00000845.1.g00002.1
PCFA377934	KGO61285	FANhyb_rscf00000845.1.g00002.1
PCFA377935	KGO61597	FANhyb_rscf00000845.1.g00002.1
PCFA377936	KGO61600	FANhyb_rscf00000845.1.g00002.1
PCFA377937	KGO61611	FANhyb_rscf00000845.1.g00002.1
PCFA377938	KGO61626	FANhyb_rscf00000845.1.g00002.1
PCFA377939	KGO63446	FANhyb_rscf00000845.1.g00002.1
PCFA377940	KGO63699	FANhyb_rscf00000845.1.g00002.1
PCFA377941	KGO63759	FANhyb_rscf00000845.1.g00002.1
PCFA377942	KGO63779	FANhyb_rscf00000845.1.g00002.1
PCFA377943	KGO64520	FANhyb_rscf00000845.1.g00002.1
PCFA377944	KGO64814	FANhyb_rscf00000845.1.g00002.1
PCFA377945	KGO66139	FANhyb_rscf00000845.1.g00002.1
PCFA377946	KGO66802	FANhyb_rscf00000845.1.g00002.1
PCFA377947	KGO67082	FANhyb_rscf00000845.1.g00002.1
PCFA377948	KGO67174	FANhyb_rscf00000845.1.g00002.1
PCFA377949	KGO68698	FANhyb_rscf00000845.1.g00002.1
PCFA377950	KGO69130	FANhyb_rscf00000845.1.g00002.1
PCFA377951	KGO70026	FANhyb_rscf00000845.1.g00002.1
PCFA377952	KGO70105	FANhyb_rscf00000845.1.g00002.1
PCFA377953	KGO70634	FANhyb_rscf00000845.1.g00002.1
PCFA377954	KGO70733	FANhyb_rscf00000845.1.g00002.1
PCFA377955	KGO71047	FANhyb_rscf00000845.1.g00002.1
PCFA377956	KGO71061	FANhyb_rscf00000845.1.g00002.1
PCFA377957	KGO71369	FANhyb_rscf00000845.1.g00002.1
PCFA377958	KGO71409	FANhyb_rscf00000845.1.g00002.1
PCFA377959	KGO71849	FANhyb_rscf00000845.1.g00002.1
PCFA377960	KGO72825	FANhyb_rscf00000845.1.g00002.1
PCFA377961	KGO73019	FANhyb_rscf00000845.1.g00002.1
PCFA377962	KGO73457	FANhyb_rscf00000845.1.g00002.1
PCFA377963	KGO73511	FANhyb_rscf00000845.1.g00002.1
PCFA377964	KGO73617	FANhyb_rscf00000845.1.g00002.1
PCFA381270	KGO70733	FANhyb_rscf00001256.1.g00001.1
PCFA387776	KGO70733	FANhyb_rscf00004771.1.g00001.1
PCSL399680	KGO70733	Solyc02g089900.1.1
PCSL419900	KGO35970	Solyc07g049180.2.1
PCSL419901	KGO36255	Solyc07g049180.2.1
PCSL419902	KGO36262	Solyc07g049180.2.1
PCSL419903	KGO36498	Solyc07g049180.2.1
PCSL419904	KGO37071	Solyc07g049180.2.1
PCSL419905	KGO37385	Solyc07g049180.2.1
PCSL419906	KGO37457	Solyc07g049180.2.1
PCSL419907	KGO37680	Solyc07g049180.2.1
PCSL419908	KGO38190	Solyc07g049180.2.1
PCSL419909	KGO38289	Solyc07g049180.2.1
PCSL419910	KGO40389	Solyc07g049180.2.1
PCSL419911	KGO40714	Solyc07g049180.2.1
PCSL419912	KGO40841	Solyc07g049180.2.1
PCSL419913	KGO43463	Solyc07g049180.2.1
PCSL419914	KGO43741	Solyc07g049180.2.1
PCSL419915	KGO44751	Solyc07g049180.2.1
PCSL419916	KGO44775	Solyc07g049180.2.1
PCSL419917	KGO46335	Solyc07g049180.2.1
PCSL419918	KGO47104	Solyc07g049180.2.1
PCSL419919	KGO47126	Solyc07g049180.2.1
PCSL419920	KGO47303	Solyc07g049180.2.1
PCSL419921	KGO47494	Solyc07g049180.2.1
PCSL419922	KGO48908	Solyc07g049180.2.1
PCSL419923	KGO49326	Solyc07g049180.2.1
PCSL419924	KGO50010	Solyc07g049180.2.1
PCSL419925	KGO50035	Solyc07g049180.2.1
PCSL419926	KGO50759	Solyc07g049180.2.1
PCSL419927	KGO50798	Solyc07g049180.2.1
PCSL419928	KGO50864	Solyc07g049180.2.1
PCSL419929	KGO50877	Solyc07g049180.2.1
PCSL419930	KGO51569	Solyc07g049180.2.1
PCSL419931	KGO51863	Solyc07g049180.2.1
PCSL419932	KGO53623	Solyc07g049180.2.1
PCSL419933	KGO54407	Solyc07g049180.2.1
PCSL419934	KGO54421	Solyc07g049180.2.1
PCSL419935	KGO54663	Solyc07g049180.2.1
PCSL419936	KGO55310	Solyc07g049180.2.1
PCSL419937	KGO55473	Solyc07g049180.2.1
PCSL419938	KGO55917	Solyc07g049180.2.1
PCSL419939	KGO56042	Solyc07g049180.2.1
PCSL419940	KGO56098	Solyc07g049180.2.1
PCSL419941	KGO58681	Solyc07g049180.2.1
PCSL419942	KGO58706	Solyc07g049180.2.1
PCSL419943	KGO59080	Solyc07g049180.2.1
PCSL419944	KGO59247	Solyc07g049180.2.1
PCSL419945	KGO60685	Solyc07g049180.2.1
PCSL419946	KGO60876	Solyc07g049180.2.1
PCSL419947	KGO61285	Solyc07g049180.2.1
PCSL419948	KGO61597	Solyc07g049180.2.1
PCSL419949	KGO61600	Solyc07g049180.2.1
PCSL419950	KGO61611	Solyc07g049180.2.1
PCSL419951	KGO61626	Solyc07g049180.2.1
PCSL419952	KGO63446	Solyc07g049180.2.1
PCSL419953	KGO63699	Solyc07g049180.2.1
PCSL419954	KGO63759	Solyc07g049180.2.1
PCSL419955	KGO63779	Solyc07g049180.2.1
PCSL419956	KGO64520	Solyc07g049180.2.1
PCSL419957	KGO64814	Solyc07g049180.2.1
PCSL419958	KGO66139	Solyc07g049180.2.1
PCSL419959	KGO66802	Solyc07g049180.2.1
PCSL419960	KGO67082	Solyc07g049180.2.1
PCSL419961	KGO67174	Solyc07g049180.2.1
PCSL419962	KGO69130	Solyc07g049180.2.1
PCSL419963	KGO70026	Solyc07g049180.2.1
PCSL419964	KGO70105	Solyc07g049180.2.1
PCSL419965	KGO70634	Solyc07g049180.2.1
PCSL419966	KGO71047	Solyc07g049180.2.1
PCSL419967	KGO71061	Solyc07g049180.2.1
PCSL419968	KGO71369	Solyc07g049180.2.1
PCSL419969	KGO71409	Solyc07g049180.2.1
PCSL419970	KGO71849	Solyc07g049180.2.1
PCSL419971	KGO72825	Solyc07g049180.2.1
PCSL419972	KGO73019	Solyc07g049180.2.1
PCSL419973	KGO73457	Solyc07g049180.2.1
PCSL419974	KGO73511	Solyc07g049180.2.1
PCSL419975	KGO73617	Solyc07g049180.2.1
PCSL429791	KGO35970	Solyc09g083210.2.1
PCSL429792	KGO36255	Solyc09g083210.2.1
PCSL429793	KGO36262	Solyc09g083210.2.1
PCSL429794	KGO36498	Solyc09g083210.2.1
PCSL429795	KGO37071	Solyc09g083210.2.1
PCSL429796	KGO37385	Solyc09g083210.2.1
PCSL429797	KGO37457	Solyc09g083210.2.1
PCSL429798	KGO37680	Solyc09g083210.2.1
PCSL429799	KGO38190	Solyc09g083210.2.1
PCSL429800	KGO38289	Solyc09g083210.2.1
PCSL429801	KGO40389	Solyc09g083210.2.1
PCSL429802	KGO40714	Solyc09g083210.2.1
PCSL429803	KGO40841	Solyc09g083210.2.1
PCSL429804	KGO43463	Solyc09g083210.2.1
PCSL429805	KGO43741	Solyc09g083210.2.1
PCSL429806	KGO44751	Solyc09g083210.2.1
PCSL429807	KGO44775	Solyc09g083210.2.1
PCSL429808	KGO46335	Solyc09g083210.2.1
PCSL429809	KGO47104	Solyc09g083210.2.1
PCSL429810	KGO47126	Solyc09g083210.2.1
PCSL429811	KGO47303	Solyc09g083210.2.1
PCSL429812	KGO47494	Solyc09g083210.2.1
PCSL429813	KGO48908	Solyc09g083210.2.1
PCSL429814	KGO49326	Solyc09g083210.2.1
PCSL429815	KGO50010	Solyc09g083210.2.1
PCSL429816	KGO50035	Solyc09g083210.2.1
PCSL429817	KGO50759	Solyc09g083210.2.1
PCSL429818	KGO50798	Solyc09g083210.2.1
PCSL429819	KGO50864	Solyc09g083210.2.1
PCSL429820	KGO50877	Solyc09g083210.2.1
PCSL429821	KGO51569	Solyc09g083210.2.1
PCSL429822	KGO51863	Solyc09g083210.2.1
PCSL429823	KGO53623	Solyc09g083210.2.1
PCSL429824	KGO54407	Solyc09g083210.2.1
PCSL429825	KGO54421	Solyc09g083210.2.1
PCSL429826	KGO54663	Solyc09g083210.2.1
PCSL429827	KGO55310	Solyc09g083210.2.1
PCSL429828	KGO55473	Solyc09g083210.2.1
PCSL429829	KGO55917	Solyc09g083210.2.1
PCSL429830	KGO56042	Solyc09g083210.2.1
PCSL429831	KGO56098	Solyc09g083210.2.1
PCSL429832	KGO58681	Solyc09g083210.2.1
PCSL429833	KGO58706	Solyc09g083210.2.1
PCSL429834	KGO59080	Solyc09g083210.2.1
PCSL429835	KGO59247	Solyc09g083210.2.1
PCSL429836	KGO60685	Solyc09g083210.2.1
PCSL429837	KGO60876	Solyc09g083210.2.1
PCSL429838	KGO61285	Solyc09g083210.2.1
PCSL429839	KGO61597	Solyc09g083210.2.1
PCSL429840	KGO61600	Solyc09g083210.2.1
PCSL429841	KGO61611	Solyc09g083210.2.1
PCSL429842	KGO61626	Solyc09g083210.2.1
PCSL429843	KGO63446	Solyc09g083210.2.1
PCSL429844	KGO63699	Solyc09g083210.2.1
PCSL429845	KGO63759	Solyc09g083210.2.1
PCSL429846	KGO63779	Solyc09g083210.2.1
PCSL429847	KGO64520	Solyc09g083210.2.1
PCSL429848	KGO64814	Solyc09g083210.2.1
PCSL429849	KGO66139	Solyc09g083210.2.1
PCSL429850	KGO66802	Solyc09g083210.2.1
PCSL429851	KGO67082	Solyc09g083210.2.1
PCSL429852	KGO67174	Solyc09g083210.2.1
PCSL429853	KGO68698	Solyc09g083210.2.1
PCSL429854	KGO69130	Solyc09g083210.2.1
PCSL429855	KGO70026	Solyc09g083210.2.1
PCSL429856	KGO70105	Solyc09g083210.2.1
PCSL429857	KGO70634	Solyc09g083210.2.1
PCSL429858	KGO70733	Solyc09g083210.2.1
PCSL429859	KGO71047	Solyc09g083210.2.1
PCSL429860	KGO71061	Solyc09g083210.2.1
PCSL429861	KGO71369	Solyc09g083210.2.1
PCSL429862	KGO71409	Solyc09g083210.2.1
PCSL429863	KGO71849	Solyc09g083210.2.1
PCSL429864	KGO72825	Solyc09g083210.2.1
PCSL429865	KGO73019	Solyc09g083210.2.1
PCSL429866	KGO73457	Solyc09g083210.2.1
PCSL429867	KGO73511	Solyc09g083210.2.1
PCSL429868	KGO73617	Solyc09g083210.2.1

## Sheet: Table S4
Supplementary Table 4. 361 randomly selected protein pairs were used as the testing data and eight of them have been identified with known DDIs.
Protein ID in P. expansum	Protein ID in tomato	DDI 1	DDI 2
KGO54853	Solyc06g074080.2.1	PF00023-PF00850	PF00069-PF00850
KGO71357	Solyc08g062330.2.1	PF00004-PF00023
KGO71997	Solyc06g052120.2.1	PF00018-PF00076
KGO46346	Solyc01g074010.2.1	PF00069-PF00627
KGO63779	Solyc01g106660.1.1	PF00069-PF02902
KGO68761	Solyc12g009520.1.1	PF00076-PF00560
KGO66329	Solyc05g014960.1.1	PF00227-PF02902
KGO66369	Solyc01g012670.1.1	PF00550-PF00636
KGO70347	Solyc05g005180.2.1
KGO48900	Solyc05g007100.2.1
KGO64866	Solyc05g007260.2.1
KGO45573	Solyc05g008440.1.1
KGO53904	Solyc05g008660.1.1
KGO72610	Solyc05g008780.2.1
KGO73264	Solyc05g009730.1.1
KGO69776	Solyc05g010460.2.1
KGO71396	Solyc05g013730.2.1
KGO69928	Solyc05g014140.1.1
KGO70527	Solyc05g015600.1.1
KGO63215	Solyc05g018290.1.1
KGO66325	Solyc05g018730.2.1
KGO66095	Solyc05g041660.1.1
KGO52044	Solyc05g042030.2.1
KGO73662	Solyc05g045740.1.1
KGO73125	Solyc05g051830.2.1
KGO47288	Solyc05g052610.2.1
KGO69574	Solyc05g052700.2.1
KGO62030	Solyc05g052780.2.1
KGO71032	Solyc05g054290.1.1
KGO72807	Solyc01g005180.1.1
KGO39045	Solyc01g006230.2.1
KGO73082	Solyc01g007820.1.1
KGO68774	Solyc01g008210.2.1
KGO70770	Solyc01g008500.2.1
KGO57314	Solyc01g009340.2.1
KGO69611	Solyc01g009670.2.1
KGO71669	Solyc01g014260.1.1
KGO44503	Solyc01g017270.1.1
KGO54849	Solyc01g017770.1.1
KGO71377	Solyc01g018050.1.1
KGO51862	Solyc01g034190.1.1
KGO46334	Solyc01g050060.1.1
KGO51246	Solyc01g056470.1.1
KGO48458	Solyc01g058000.2.1
KGO66808	Solyc01g060160.1.1
KGO50070	Solyc01g066570.2.1
KGO63493	Solyc01g066660.1.1
KGO51762	Solyc01g067000.2.1
KGO47220	Solyc01g067920.1.1
KGO66733	Solyc01g068630.2.1
KGO58676	Solyc01g079880.2.1
KGO38415	Solyc01g080820.1.1
KGO66889	Solyc01g087000.2.1
KGO71600	Solyc01g087210.2.1
KGO69324	Solyc01g090230.2.1
KGO72191	Solyc01g090300.2.1
KGO72559	Solyc01g091040.2.1
KGO37645	Solyc01g096770.2.1
KGO55335	Solyc01g098470.2.1
KGO66818	Solyc01g099310.2.1
KGO44958	Solyc01g100240.2.1
KGO60466	Solyc01g101020.2.1
KGO65100	Solyc01g101100.2.1
KGO73441	Solyc01g102450.2.1
KGO41193	Solyc01g102470.2.1
KGO69965	Solyc01g102930.1.1
KGO70250	Solyc01g105700.2.1
KGO55618	Solyc01g106180.1.1
KGO69582	Solyc01g107380.2.1
KGO71342	Solyc01g108420.2.1
KGO62795	Solyc01g108890.2.1
KGO44648	Solyc01g109070.2.1
KGO70132	Solyc01g109650.2.1
KGO71348	Solyc01g111420.2.1
KGO71627	Solyc02g021570.1.1
KGO56520	Solyc02g021770.1.1
KGO66618	Solyc02g024010.1.1
KGO72399	Solyc02g032340.1.1
KGO58538	Solyc02g061680.1.1
KGO65154	Solyc02g063260.2.1
KGO63258	Solyc02g064710.2.1
KGO69867	Solyc02g067710.1.1
KGO64101	Solyc02g068140.2.1
KGO62507	Solyc02g068350.1.1
KGO45414	Solyc02g070250.2.1
KGO63687	Solyc02g071770.2.1
KGO38135	Solyc02g071810.2.1
KGO55916	Solyc02g072550.1.1
KGO36208	Solyc02g077250.2.1
KGO65536	Solyc02g077830.1.1
KGO38781	Solyc02g078500.2.1
KGO54484	Solyc02g079050.2.1
KGO64336	Solyc02g083460.2.1
KGO69512	Solyc02g083680.1.1
KGO47277	Solyc02g083860.2.1
KGO55779	Solyc02g084380.2.1
KGO56478	Solyc02g085820.2.1
KGO68741	Solyc02g086510.2.1
KGO50205	Solyc02g088420.1.1
KGO56500	Solyc02g088430.1.1
KGO36602	Solyc02g089670.2.1
KGO64515	Solyc02g091480.1.1
KGO38281	Solyc02g092680.1.1
KGO60888	Solyc10g006510.2.1
KGO50469	Solyc10g007700.2.1
KGO47461	Solyc10g007850.2.1
KGO38142	Solyc10g008820.2.1
KGO71604	Solyc10g009340.1.1
KGO59628	Solyc10g011750.2.1
KGO56591	Solyc10g017640.1.1
KGO38104	Solyc10g018030.1.1
KGO39252	Solyc10g018390.1.1
KGO72576	Solyc10g019100.1.1
KGO45702	Solyc10g038040.1.1
KGO45549	Solyc10g044970.1.1
KGO55321	Solyc10g045530.1.1
KGO38470	Solyc10g047080.1.1
KGO44865	Solyc10g047760.1.1
KGO60680	Solyc10g054420.1.1
KGO73647	Solyc10g054500.1.1
KGO36147	Solyc10g080080.1.1
KGO36278	Solyc10g084100.1.1
KGO37074	Solyc10g084840.1.1
KGO51570	Solyc10g085160.1.1
KGO67365	Solyc10g085970.1.1
KGO65070	Solyc10g086120.1.1
KGO67174	Solyc10g086270.1.1
KGO43474	Solyc10g086520.1.1
KGO55330	Solyc06g005710.2.1
KGO45407	Solyc06g007800.2.1
KGO70813	Solyc06g008860.2.1
KGO50193	Solyc06g024240.1.1
KGO39201	Solyc06g016730.1.1
KGO56603	Solyc06g035630.1.1
KGO64801	Solyc06g036570.1.1
KGO58510	Solyc06g043060.1.1
KGO55020	Solyc06g048390.1.1
KGO68327	Solyc06g048460.1.1
KGO71366	Solyc06g048690.1.1
KGO53626	Solyc06g048840.2.1
KGO43730	Solyc06g050500.2.1
KGO47429	Solyc06g050890.1.1
KGO59124	Solyc06g054390.2.1
KGO71416	Solyc06g060690.2.1
KGO69459	Solyc06g061270.1.1
KGO55951	Solyc06g063130.2.1
KGO72832	Solyc06g063410.2.1
KGO70038	Solyc06g064870.2.1
KGO70718	Solyc06g065040.2.1
KGO54473	Solyc06g066010.2.1
KGO50439	Solyc06g066050.2.1
KGO71176	Solyc06g066490.1.1
KGO52855	Solyc06g071050.2.1
KGO63873	Solyc06g071720.1.1
KGO67081	Solyc06g072450.1.1
KGO56477	Solyc06g073020.2.1
KGO69146	Solyc06g073800.2.1
KGO36628	Solyc06g075930.1.1
KGO55016	Solyc06g076210.1.1
KGO54163	Solyc09g005100.2.1
KGO48867	Solyc09g005680.1.1
KGO68612	Solyc09g007810.2.1
KGO65747	Solyc09g007930.2.1
KGO67068	Solyc09g008410.2.1
KGO73594	Solyc09g009310.1.1
KGO73020	Solyc09g009970.2.1
KGO71603	Solyc09g014650.1.1
KGO43037	Solyc09g014790.2.1
KGO66190	Solyc09g014800.1.1
KGO55922	Solyc09g014890.2.1
KGO41206	Solyc09g015010.2.1
KGO54017	Solyc09g018810.1.1
KGO40392	Solyc09g037030.1.1
KGO70534	Solyc09g042440.1.1
KGO47413	Solyc09g042780.2.1
KGO41211	Solyc09g031830.1.1
KGO42443	Solyc09g031640.1.1
KGO47109	Solyc09g055920.2.1
KGO70886	Solyc09g056170.2.1
KGO62304	Solyc09g059670.2.1
KGO50054	Solyc09g061640.1.1
KGO47134	Solyc09g061820.2.1
KGO44105	Solyc09g065140.1.1
KGO61328	Solyc09g066480.2.1
KGO36199	Solyc09g074820.2.1
KGO38182	Solyc09g075760.2.1
KGO72824	Solyc09g082770.2.1
KGO70154	Solyc09g084470.2.1
KGO37068	Solyc09g091410.1.1
KGO73083	Solyc09g092510.2.1
KGO41479	Solyc09g092730.1.1
KGO72309	Solyc09g098510.2.1
KGO70171	Solyc03g005880.2.1
KGO70041	Solyc03g006490.2.1
KGO63440	Solyc03g025940.1.1
KGO63446	Solyc03g043930.2.1
KGO51863	Solyc03g043980.1.1
KGO73665	Solyc03g044970.1.1
KGO49395	Solyc03g058740.1.1
KGO68620	Solyc03g063390.1.1
KGO71192	Solyc03g063640.1.1
KGO45412	Solyc03g013390.1.1
KGO38111	Solyc03g083010.2.1
KGO64233	Solyc03g083020.2.1
KGO68718	Solyc03g083570.2.1
KGO66439	Solyc03g096210.1.1
KGO70643	Solyc03g096390.2.1
KGO40504	Solyc03g096710.1.1
KGO50014	Solyc03g098620.2.1
KGO68765	Solyc03g098700.1.1
KGO52662	Solyc03g115630.2.1
KGO67189	Solyc03g115730.2.1
KGO36256	Solyc03g116820.2.1
KGO65735	Solyc03g117760.2.1
KGO67032	Solyc03g118690.2.1
KGO48900	Solyc03g119410.1.1
KGO38475	Solyc03g121230.2.1
KGO64229	Solyc03g121430.1.1
KGO64816	Solyc03g121850.2.1
KGO69135	Solyc03g122090.2.1
KGO61382	Solyc03g122240.2.1
KGO66511	Solyc08g005040.1.1
KGO51883	Solyc08g005820.1.1
KGO67967	Solyc08g006080.1.1
KGO71417	Solyc08g007120.2.1
KGO70615	Solyc08g007220.2.1
KGO70252	Solyc08g013730.2.1
KGO66189	Solyc08g014120.2.1
KGO67361	Solyc08g015720.1.1
KGO54016	Solyc08g048510.1.1
KGO61008	Solyc08g048260.1.1
KGO66753	Solyc08g029300.1.1
KGO72007	Solyc08g065600.1.1
KGO67215	Solyc08g066220.2.1
KGO52937	Solyc08g066480.1.1
KGO66257	Solyc08g067970.2.1
KGO62508	Solyc08g075240.2.1
KGO41688	Solyc08g075300.2.1
KGO48868	Solyc08g076330.1.1
KGO43460	Solyc08g077540.1.1
KGO69062	Solyc08g077850.1.1
KGO70141	Solyc08g078050.1.1
KGO44139	Solyc08g078680.2.1
KGO60690	Solyc08g078980.1.1
KGO43466	Solyc08g080580.2.1
KGO65041	Solyc08g082720.2.1
KGO50650	Solyc11g005400.1.1
KGO61829	Solyc11g005450.1.1
KGO64750	Solyc11g007520.1.1
KGO67234	Solyc11g007550.1.1
KGO63706	Solyc11g010380.1.1
KGO65974	Solyc11g010490.1.1
KGO47067	Solyc11g011580.1.1
KGO71332	Solyc11g011710.1.1
KGO65468	Solyc11g012010.1.1
KGO70817	Solyc11g012370.1.1
KGO67849	Solyc11g013810.1.1
KGO46340	Solyc11g018740.1.1
KGO55937	Solyc11g020260.1.1
KGO70366	Solyc11g020320.1.1
KGO70025	Solyc11g022600.1.1
KGO57673	Solyc11g027640.1.1
KGO55237	Solyc11g027650.1.1
KGO72488	Solyc11g027900.1.1
KGO51493	Solyc11g030430.1.1
KGO73652	Solyc11g032060.1.1
KGO72093	Solyc11g032220.1.1
KGO68199	Solyc11g040150.1.1
KGO64808	Solyc11g056630.1.1
KGO70019	Solyc11g065100.1.1
KGO66520	Solyc11g065110.1.1
KGO45178	Solyc11g065350.1.1
KGO61050	Solyc11g066010.1.1
KGO67045	Solyc11g066980.1.1
KGO68732	Solyc11g067170.1.1
KGO42058	Solyc11g072640.1.1
KGO38561	Solyc11g072770.1.1
KGO47720	Solyc04g005780.1.1
KGO72257	Solyc04g008050.2.1
KGO63905	Solyc04g009340.2.1
KGO65403	Solyc04g009610.2.1
KGO65808	Solyc04g009690.1.1
KGO66853	Solyc04g014270.2.1
KGO50072	Solyc04g014750.1.1
KGO62314	Solyc04g016150.1.1
KGO54188	Solyc04g016310.1.1
KGO65994	Solyc04g026320.1.1
KGO63786	Solyc04g025420.1.1
KGO64471	Solyc04g025260.2.1
KGO63692	Solyc04g024680.1.1
KGO36189	Solyc04g049420.1.1
KGO47120	Solyc04g050200.1.1
KGO56514	Solyc04g050550.1.1
KGO67387	Solyc04g051660.2.1
KGO65213	Solyc04g052890.1.1
KGO67047	Solyc04g054760.2.1
KGO50052	Solyc04g072310.2.1
KGO47419	Solyc04g073960.2.1
KGO49323	Solyc04g076430.2.1
KGO63885	Solyc04g078000.2.1
KGO57928	Solyc04g078100.1.1
KGO68064	Solyc04g078150.2.1
KGO67055	Solyc04g079050.1.1
KGO55759	Solyc04g079490.1.1
KGO71368	Solyc04g079810.1.1
KGO68191	Solyc04g079990.2.1
KGO58521	Solyc04g080690.1.1
KGO58051	Solyc04g080810.2.1
KGO44630	Solyc12g005050.1.1
KGO55269	Solyc12g005230.1.1
KGO45570	Solyc12g005960.1.1
KGO67344	Solyc12g011160.1.1
KGO52537	Solyc12g015780.1.1
KGO40250	Solyc12g020050.1.1
KGO70540	Solyc12g076310.1.1
KGO52228	Solyc12g077440.1.1
KGO66354	Solyc12g077460.1.1
KGO54854	Solyc12g062760.1.1
KGO54749	Solyc12g049540.1.1
KGO43060	Solyc12g040530.1.1
KGO40974	Solyc12g040360.1.1
KGO57672	Solyc12g038150.1.1
KGO50777	Solyc12g033080.1.1
KGO65957	Solyc12g088270.1.1
KGO55014	Solyc12g088280.1.1
KGO48874	Solyc12g088790.1.1
KGO63459	Solyc12g095990.1.1
KGO48914	Solyc12g096100.1.1
KGO68958	Solyc12g099720.1.1
KGO63795	Solyc07g005040.2.1
KGO65191	Solyc07g005200.2.1
KGO58666	Solyc07g005350.2.1
KGO35982	Solyc07g006200.2.1
KGO64750	Solyc07g006870.2.1
KGO51826	Solyc07g007980.2.1
KGO64000	Solyc07g008130.2.1
KGO56033	Solyc07g008300.1.1
KGO56044	Solyc07g016200.2.1
KGO51242	Solyc07g018260.1.1
KGO38663	Solyc07g018320.1.1
KGO40894	Solyc07g021570.1.1
KGO68705	Solyc07g022780.2.1
KGO36260	Solyc07g022890.1.1
KGO51723	Solyc07g026740.1.1
KGO63888	Solyc07g032720.1.1
KGO58514	Solyc07g041180.2.1
KGO68832	Solyc07g041960.1.1
KGO55696	Solyc07g042570.2.1
KGO65838	Solyc07g042830.2.1
KGO70613	Solyc07g044770.1.1
KGO36147	Solyc07g045340.2.1
KGO58656	Solyc07g045570.1.1
KGO55950	Solyc07g049140.2.1
KGO56486	Solyc07g054650.1.1
KGO66133	Solyc07g054710.1.1
KGO50090	Solyc07g055440.1.1
KGO72847	Solyc07g061710.1.1
KGO36228	Solyc07g063480.2.1
KGO42446	Solyc07g064640.2.1
KGO66819	Solyc07g065810.2.1
KGO73320	Solyc07g066480.2.1

## Sheet: Table S5
Supplementary Table 5. 361 protein interactions were used as the experimental data and 56 of them have been identified with known DDIs.
Protein ID in pathogens	Protein ID in plants	DDI 1	DDI 2	DDI 3	DDI 4	DDI 5
Q8FD66	Q9ZWS9	PF00072-PF00072	PF00072-PF00512	PF00072-PF00989	PF00072-PF01627	PF00072-PF02518
P20081	Q9FR53	PF00254-PF00454	PF00254-PF02259	PF00254-PF02260	PF00254-PF08771
P39458	P00221	PF00111-PF00384	PF00111-PF01568	PF00111-PF04879
P39928	Q9SAZ5	PF00072-PF01627	PF00512-PF01627	PF01627-PF02518
P39928	Q9ZNV8	PF00072-PF01627	PF00512-PF01627	PF01627-PF02518
P39928	Q9ZNV9	PF00072-PF01627	PF00512-PF01627	PF01627-PF02518
P29509	Q38879	PF00070-PF00085	PF00085-PF07992
P02829	Q9SIF2	PF00183-PF00183	PF00183-PF02518
P15108	Q9SIF2	PF00183-PF00183	PF00183-PF02518
P52286	O81057	PF01466-PF03931	PF03931-PF03931
P52286	O81058	PF01466-PF03931	PF03931-PF03931
P52286	Q1PEL7	PF01466-PF03931	PF03931-PF03931
P52286	Q9M1X5	PF01466-PF03931	PF03931-PF03931
P52286	Q9SL65	PF01466-PF03931	PF03931-PF03931
P52286	Q9SY65	PF01466-PF03931	PF03931-PF03931
P41909	Q94FB9	PF00005-PF00005
P34230	Q94FB9	PF00005-PF00005
P25323	Q39023	PF00069-PF00069
P06782	Q42384	PF00069-PF00400
P12904	Q38997	PF00069-PF00571
P12904	P92958	PF00069-PF00571
P06782	Q944A6	PF00069-PF00571
P08463	P24100	PF00069-PF01111
P08463	P25859	PF00069-PF01111
P32835	Q9FZK4	PF00071-PF02136
P32835	Q9C7F5	PF00071-PF02136
P00782	Q40059	PF00082-PF00280
P00782	P01053	PF00082-PF00280
P18408	Q38879	PF00085-PF01507
Q55389	P07591	PF00085-PF02943
Q55389	P09856	PF00085-PF02943
P00777	P01080	PF00089-PF02428
P00777	O82735	PF00089-PF02428
Q868H0	P00784	PF00112-PF09394
P0A3E0	P10933	PF00175-PF00258
P53152	Q9FZ48	PF00179-PF00179
P53152	Q94A97	PF00179-PF00179
P52490	Q9SVD7	PF00179-PF00179
P52490	Q93YP0	PF00179-PF00179
P17649	Q94CE5	PF00202-PF00202
O09234	Q7Y1U3	PF00228-PF00949
P04050	B9DHA6	PF00240-PF00623
P48510	P55034	PF00240-PF02809
P48510	O48726	PF00240-PF04683
Q9HFH0	Q8L5C6	PF00457-PF00704
P0A9Z1	Q9ZST4	PF00543-PF00543
P0A3F4	Q9ZST4	PF00543-PF00543
P0AC55	Q9ZST4	PF00543-PF00543
P0A3F4	P69365	PF00543-PF00696
P0A3F4	Q9SCL7	PF00543-PF00696
P12904	Q9SCY5	PF00571-PF04739
P12904	Q84VQ1	PF00571-PF04739
P32798	Q9ZT63	PF01545-PF01545
P20107	Q9ZT63	PF01545-PF01545
P13835	Q8GYN5	PF05394-PF05627
Q87Y16	Q40234	PF07714-PF11592
P03586	Q75WV4
Q764F6	A5YVF1
Q764F6	Q9LDX1
P0AA25	P23321
P52231	P23321
P52231	Q9S841
P0AA25	Q9S841
P0AA25	P81760
P0AA25	Q9LU86
P52231	Q9LU86
P52231	P49107
P52231	Q8W493
Q8NID8	Q8S335
A1L015	Q8S335
A1L017	Q8S335
P0AA25	P82281
P52231	P82281
P0AA25	Q9SCY2
P0AA25	O22160
P0AA25	Q39249
P52231	Q39249
P0AA25	Q9LXX5
P52231	Q9LXX5
P52231	Q42029
P0AA25	Q42029
P0AA25	Q0WRJ7
P52231	P82658
P52231	Q9SSA5
P52231	O23614
P52231	Q9ZP02
P52231	Q9SEL7
P52231	Q9FL23
P52231	F4KHG6
P52231	Q8W484
P52231	Q8H1Q1
P52231	O22609
P52231	Q9LW57
P52231	Q2V3V3
P52231	Q56ZZ9
P52231	O03042
P03586	B2C7Y6
P03586-PRO_0000041163	B2C7Y6
P90211-PRO_0000041189	B2C7Y6
Q04049	Q9ZW35
P25454	Q0PCS3
P06782	Q9SCY5
P32863	P94102
P06782	Q84VQ1
P15597	Q9FHW7
P24814	Q9FHW7
Q65967	Q9FHW7
Q8JZ12	Q9FHW7
P15873	Q8H2D5
Q04049	Q9M7Q7
Q65967	Q39255
P24814	Q39255
P15597	Q39255
Q8JZ12	Q39255
O12369	P05434
Q88A90	Q8GYN5
Q7BE94	Q8GYN5
P0A3W9	Q9MA75
P15597	Q9MA75
P07543	Q9MA75
INTACT:EBI-9839023	A0JPW5
INTACT:EBI-9839632	A0JPW5
INTACT:EBI-9838821	F4IPY5
P52231	F4J036
INTACT:EBI-9839632	F4J3S6
INTACT:EBI-9839685	F4J5N9
INTACT:EBI-9839317	F4J5N9
INTACT:EBI-9838050	F4J5N9
INTACT:EBI-9839007	F4JG03
INTACT:EBI-9838545	O22768
INTACT:EBI-9838220	O23016
P15597	O49484
INTACT:EBI-9838545	O49629
INTACT:EBI-9839078	O64647
INTACT:EBI-9838267	O64647
INTACT:EBI-9838250	O64647
INTACT:EBI-9838821	O64647
INTACT:EBI-9838708	O64647
INTACT:EBI-9838750	O64647
INTACT:EBI-9839402	O64722
INTACT:EBI-9838545	O64722
INTACT:EBI-9838050	O64722
P15597	O65674
INTACT:EBI-9838050	O81313
INTACT:EBI-9838545	O81439
P27320	P07591
Q80936	P14712
INTACT:EBI-9838050	P46639
P73091	P83755
P40350	P83755
INTACT:EBI-9838932	Q0WLB5
INTACT:EBI-9838050	Q0WLB5
INTACT:EBI-9838545	Q17TI5
INTACT:EBI-9838050	Q1JPM3
INTACT:EBI-9839632	Q38829
INTACT:EBI-9839532	Q38845
INTACT:EBI-9838750	Q38845
P07260	Q38879
P38013	Q38879
P34760	Q38879
P40029	Q38879
P40350	Q38885
INTACT:EBI-9839532	Q38950
P40029	Q42403
P38013	Q42403
P07260	Q42403
P00330	Q42403
C1KKL7	Q42547
P0C783	Q42547
INTACT:EBI-9838514	Q84JS6
INTACT:EBI-9839317	Q84K25
INTACT:EBI-9839304	Q84WV8
INTACT:EBI-9839494	Q84WV8
INTACT:EBI-9839065	Q84WV8
INTACT:EBI-9839455	Q84WV8
INTACT:EBI-9838050	Q8GY51
P32505	Q8H0U4
INTACT:EBI-9838964	Q8L7G9
INTACT:EBI-9838750	Q8LAZ7
INTACT:EBI-9838737	Q8LAZ7
INTACT:EBI-9838821	Q8LAZ7
INTACT:EBI-9838470	Q8LAZ7
INTACT:EBI-9838964	Q8LAZ7
INTACT:EBI-9838504	Q8LAZ7
INTACT:EBI-9839402	Q8LAZ7
INTACT:EBI-9839317	Q8LAZ7
INTACT:EBI-9838545	Q8LAZ7
P40350	Q8LBP4
INTACT:EBI-9838050	Q8LPN5
INTACT:EBI-9838545	Q8RXF2
INTACT:EBI-9838050	Q8S8Y9
INTACT:EBI-9839317	Q8VWI0
INTACT:EBI-9839577	Q93V84
INTACT:EBI-9838545	Q93YR9
INTACT:EBI-9839481	Q93Z00
INTACT:EBI-9839516	Q93Z00
INTACT:EBI-9839494	Q93Z00
INTACT:EBI-9838152	Q93Z00
INTACT:EBI-9838064	Q93Z00
INTACT:EBI-9838121	Q93Z00
INTACT:EBI-9839610	Q93Z00
G3C9R4	Q93Z00
INTACT:EBI-9838750	Q93Z00
INTACT:EBI-9838101	Q93Z00
INTACT:EBI-9838250	Q93Z00
INTACT:EBI-9839264	Q93Z00
INTACT:EBI-9838460	Q93Z00
INTACT:EBI-9833933	Q93Z00
INTACT:EBI-9838172	Q93Z00
INTACT:EBI-9838304	Q93Z00
INTACT:EBI-9838267	Q93Z00
INTACT:EBI-9838050	Q93Z00
INTACT:EBI-9838318	Q93Z00
G3C9R9	Q93Z00
INTACT:EBI-9838284	Q93Z00
INTACT:EBI-9838186	Q93Z00
INTACT:EBI-9839402	Q93Z00
INTACT:EBI-9833993	Q93Z00
INTACT:EBI-9833981	Q93Z00
INTACT:EBI-9838206	Q93Z00
INTACT:EBI-9838135	Q93Z00
INTACT:EBI-9838220	Q93Z00
INTACT:EBI-9839532	Q93Z00
INTACT:EBI-9838401	Q93Z00
G3C9N6	Q93Z00
INTACT:EBI-9838932	Q93ZH3
Q8PL31	Q94F62
INTACT:EBI-9839610	Q96331
INTACT:EBI-9838545	Q96331
INTACT:EBI-9838708	Q96331
INTACT:EBI-9838186	Q96331
INTACT:EBI-9839317	Q9ASS9
INTACT:EBI-9838050	Q9ASW4
P15597	Q9C5T5
INTACT:EBI-9839577	Q9C717
INTACT:EBI-9838891	Q9C889
INTACT:EBI-9839402	Q9C9L2
INTACT:EBI-9838250	Q9C9L2
INTACT:EBI-9838545	Q9C9L2
INTACT:EBI-9838821	Q9C9L2
INTACT:EBI-9838750	Q9FH07
INTACT:EBI-9838545	Q9FIG9
INTACT:EBI-9839317	Q9FIR9
INTACT:EBI-9839264	Q9FJP7
INTACT:EBI-9838545	Q9FJP7
Q8PL31	Q9FL28
INTACT:EBI-9838821	Q9FPE8
INTACT:EBI-9838545	Q9FPE8
P16666	Q9FR53
INTACT:EBI-9838891	Q9FZ63
INTACT:EBI-9838050	Q9LD47
INTACT:EBI-9839632	Q9LEZ3
INTACT:EBI-9838891	Q9LIC6
INTACT:EBI-9838152	Q9LK77
INTACT:EBI-9838514	Q9LK77
INTACT:EBI-9838545	Q9LK77
INTACT:EBI-9838050	Q9LMN5
INTACT:EBI-9839402	Q9LSD5
INTACT:EBI-9839468	Q9LSD5
INTACT:EBI-9839532	Q9LSD5
INTACT:EBI-9838808	Q9LSD5
INTACT:EBI-9838695	Q9LSD5
INTACT:EBI-9838821	Q9LSD5
P15597	Q9LSY1
INTACT:EBI-9838545	Q9LVI4
INTACT:EBI-9838050	Q9M155
INTACT:EBI-9839317	Q9M2E8
INTACT:EBI-9839577	Q9S7L6
INTACT:EBI-9838964	Q9S7W5
INTACT:EBI-9838545	Q9S7W5
INTACT:EBI-9838050	Q9S7W5
INTACT:EBI-9838932	Q9SS88
INTACT:EBI-9838821	Q9STS3
INTACT:EBI-9838750	Q9SYG2
Q99344	Q9SYM2
INTACT:EBI-9839023	Q9SZI2
P33927	Q9XI46
P52286	Q9ZU90
Q3HM11	Q71VM4
P02829	Q9LSM5
Q3HM11	P84634
P38886	Q9SII8
P18429	Q8H0K8
P55329	Q8H0K8
P79085	B6CQT3
P79085	I3RTU5
Q85449	O22544
P16666	O49160
Q75760	P11218
P79085	P81370
Q88A91	Q03250
P18429	Q53IQ4
P06492	Q7XYY2
P38886	Q84L32
Q887D0	Q84L32
Q55168	Q9LNW0
Q55168	Q9ZW31
A8VZX9	O80480
Q44445	Q96321
P06668	Q96321
A9CL09	Q8W3M8
P11690	Q6JAC7
Q12442	P14170
Q8RSY1	Q40234
GENBANK_IDENTIFIER:157879794	P28147
GENBANK_IDENTIFIER:157879795	P28147
P05351	O24466
NCBI_ACC:NP_536286.1	O24466
P06668	P34791
P05351	Q9SUT9
NCBI_ACC:NP_536286.1	Q9SUT9
P05351	Q9SUR3
NCBI_ACC:NP_536286.1	Q9SUR3
P06668	Q42406
P06668	P34790
P06663	Q9LKG8
NCBI_ACC:NP_734219.1	O04663
NCBI_ACC:NP_536286.1	Q9FFS0
P05351	Q9FFS0
NCBI_ACC:NP_620885.1	Q7X9V3
P21935	Q7X9V3
NCBI_ACC:NP_624352.1	Q7X9V3
Q6Q546	Q8LB54
P35127	Q8L9T5
P39944	Q8L9T5
P50101	Q8L9T5
P43593	Q8L9T5
P53874	Q8L9T5
P32571	Q8L9T5
P40453	Q8L9T5
Q02863	Q8L9T5
P15731	Q8L9T5
P39967	Q8L9T5
P38237	Q8L9T5
P05374	Q9FR44
P05375	Q9FR44
O42839	Q8VZS9
O42839	Q8L3Z8
O42839	Q8LPL5
P38237	Q9LUZ9
P50101	Q9LUZ9
P43593	Q9LUZ9
P15731	Q9LUZ9
P32571	Q9LUZ9
P09880	Q0WL81
P38962	Q8LEK2
Q99260	Q8LEK2
P06839	Q9ZVN9
Q04673	Q8W4M7
P05375	Q944H0
P05374	Q944H0
P38886	Q84L33
Q887D0	F4IHF0
Q887D0	F4IXW2
Q887D0	O82240
Q887D0	P48348
Q887D0	Q1G3U6
P03567	Q5HZ38
P03567	Q93V58
Q887D0	Q9FJZ7
Q887D0	Q9FMG6
